# Supplementary material for: Cloning of Glycerophosphocholine Acyltransferase (GPCAT) from Fungi and Plants: A NOVEL ENZYME IN PHOSPHATIDYLCHOLINE SYNTHESIS
Source: PubMed Central journal article supplement (PMC5122774; doi:10.1074/jbc.m116.743062), 2016-10-07
Supplement: 10.1074_M116.743062_jbc.M116.743062-1.pdf [file 10.1074_M116.743062_jbc.M116.743062-1.pdf]

## Cloning and characterization of GPCATs

```

PpaGPCATH1 1 K-----
PpaGPCATH2 1 K-----
SmoGPCATH1 1 MAPDDAG-----
SmoGPCATH2 1 VQ-----
ZmaGPCATH1 1 MASEVEDD-----
ZmaGPCATH2 1 MASEVEDE-----
OsaGPCATH 1 MASEVEDD-----
MacGPCATH1 1 MGDGETGS-----
StuGPCATH1 1 MSSNEESM-----
StuGPCATH2 1 MEEYNGD-----
RcoGPCATH 1 MSNNEDI-----
AthGPCATH 1 MANNEDSN-----
BvuGPCATH 1 MNDSSEFHINILHHQLPF-----
NnuGPCATH 1 MSNKEDAE-----
EguGPCATH 1 MSEGAGL-----
NadGPCATH 1 GWFTLKKRT-----
AtrGPCATH 1 MESYESP-----
LtuGPCATH 1 GEKKKGRRK--LLKNRP-----
AfiGPCATH 1 NPARIQHSE-----
KfiGPCATH 1 MGLILEAA-----
EmuGPCATH 1 MVLAPLQNK-----
OviGPCATH 1 MAPSIANI-----
SpuGPCATH 1 MSLQNLNGCSLKQ-----
CgiGPCATH 1 MRDTLKENTKQFATA-----
LgiGPCATH1 1 MMVDKEDAKRKTQN-----
LgiGPCATH2 1 MTSQSMNYNQNILIV-----
LcoGPCATH 1 MAASMTKPPPELADSH----S-MSS-----
MciGPCATH1 1 MTPKEDTPGDSDLQDT----T-VAAAAA-E-----
MciGPCATH2 1 MLTEERLEHLSSHESD----A-----
MveGPCATH 1 MVTSSIDGPTHNPSST----M-SS-SDS---DSD--VPLTRISAPDPD-EHTYMDANATD-----PAWISE
UmaGPCATH 1 MRRASSTSTYSHVSD----V-SS-SGD---ALR--PTLSRASSTACSD-----DGSLSTPSFRTHHSSASASME-----
LbiGPCATH 1 MWHSTLVFADT-----
SpoGPCATH 1 MDHLEFDENTDSEYSI----F-E-----
SceGPCATH 1 MYKLDNNDIDDET-----
LthGPCATH 1 MDIPDTLDTDSDEGS-----
PkuGPCATH 1 MDIDNMEKDNGCSTP----T-SDES-----
NcrGPCATH 1 MADLAEPEISLPVSGL----S-HKSEGAPSTDGE--AILTPDTPSTPPLNSSPGEHDPNTPT-----LDVTT
CbaGPCATH 1 MSEPIRIPLSKTDITL---D-EM--AS-----H--DIAGSASTDTAGS-LTGALTPGYQSG-----YQSSS
AclGPCATH 1 MEGAGLDDHPGGGRTA----Q-VTGAGN-----S--PLLPPAAVDDMDA-VYDTDEYAPSST-----RSYSP
CglGPCATH 1 MADSEDRSKPISIPGN----N-NRWEA--STDSE--AILTPELSGSPD-DDSHEHAVVTPT-----LGPTV
BbaGPCATH 1 MDDEQPAAVSHPNPNA----T-FQDSIS-D---E--HHTEPGLTSPLSS-SPPDPTILDTPS-----LIATT
DdiGPCATH1 1 MEVLASEISSNEKSAF-----
DdiGPCATH2 1 MEKKDKNEKISSSPI----N-IFRRYS-I-----
AsuGPCATH 1 MTMTMMVIKVEKHSKV----G-----
EdiGPCATH 1 MSTSSEKYQREFQ-----
AcaGPCATH1 1 MDHKKVDKHEHNSRA----G-----
AcaGPCATH2 1 MADAVHNEPEADIRAY-----
PbrGPCATH 1 IQQTSADLAYVGTTRL--RRVYRVASADC---DPV--V-----CINKVT-----IY
NgrGPCATH1 1 MEKQEEIEITNNNFDS----E-----
NgrGPCATH2 1 MSQQTKKKKESKQEK----K-----
MbrGPCATH 1 MASESTVPADPAESPL----G-LSQ-----
BsaGPCATH 1 MWWEIFGVFGVC-----
OtaGPCATH 1 MRRTRSVRSDD-----
MpuGPCATH1 1 MASPIAAAAAT-----
MpuGPCATH2 1 MSPSFAEP-----
MspGPCATH1 1 MAEAVMRRRRR-----
MspGPCATH2 1 MNLEPPTL-----
CreGPCATH 1 MESFGVAAAEAA-----
CowGPCATH 1 MPANEAPLSPSINATT----ATSPATT--ETTTAAATNTNPSGAAAN-GVQDGGKAQ-----T
CmeGPCATH 1 MDDGGRALGSVDHF----D-ET-----

```

## Cloning and characterization of GPCATs

```

PpaGPCATH1 2 -----
PpaGPCATH2 2 -----
SmoGPCATH1 9 -----
SmoGPCATH2 3 -----
ZmaGPCATH1 9 -----
ZmaGPCATH2 9 -----
OsaGPCATH 9 -----
MacGPCATH1 9 -----
StuGPCATH1 9 -----
StuGPCATH2 9 -----
RcoGPCATH 9 -----
AthGPCATH 9 -----
BvuGPCATH 20 ----- IE-----
NnuGPCATH 9 -----
EguGPCATH 9 -----
NadGPCATH 10 -----
AtrGPCATH 8 -----
LtuGPCATH 16 -----
AfiGPCATH 10 -----
KfiGPCATH 9 -----
EmuGPCATH 11 -----
OviGPCATH 10 -----
SpuGPCATH 15 -----
CgiGPCATH 16 -----
LgiGPCATH1 15 -----
LgiGPCATH2 16 -----
LcoGPCATH 21 ----- GS-----
MciGPCATH1 25 ----- TA-----
MciGPCATH2 18 ----- S-----
MveGPCATH 56 PTPP-----SLGPTS-----LVPN-----
UmaGPCATH 60 -----
LbiGPCATH 12 -----
SpoGPCATH 19 -----
SceGPCATH 15 -----
LthGPCATH 17 -----
PkuGPCATH 22 -----
NcrGPCATH 61 PKSP-----AVLS-----RNS-----
CbaGPCATH 53 PGSP-----YLLS-----RNP-----
AclGPCATH 55 TASP-----PSLS-----RNH-----
CglGPCATH 59 PTSP-----RLS-----RNP-----
BbaGPCATH 56 PKSP-----KLS-----RHP-----
DdiGPCATH1 17 ----- TEEEDDYEFSDSETDSL-----
DdiGPCATH2 25 ----- AD-----
AsuGPCATH 18 -----
EdiGPCATH 15 -----
AcaGPCATH1 18 -----
AcaGPCATH2 17 ----- EPQAADA-----
PbrGPCATH 40 PAS-----AAPKG-----IFVW-----MPLNRA-----RRRG
NgrGPCATH1 18 -----ERMDQRMDQGKEGMADHYGSS-----
NgrGPCATH2 18 -----QEQDP-----
MbrGPCATH 21 ----- ES-----
BsaGPCATH 13 -----LVVYAAVTRFTTLAAITQMGSIQ-----
OtaGPCATH 12 -----ATVDE-----L-----SRARERAK-----
MpuGPCATH1 12 -----AAVTG-----LV-----RRM-----RRR-----
MpuGPCATH2 9 -----
MspGPCATH1 12 -----GE-----
MspGPCATH2 9 -----
CreGPCATH 13 -----
CowGPCATH 52 ---SSTSENAVQTMERPRSAL-----LRPGQEEQEQAEREAHQTTTHQLHDGYAAA-----
CmeGPCATH 20 -----D-----

```

*Cloning and characterization of GPCATs*

|            |    |                                                                |
|------------|----|----------------------------------------------------------------|
| PpaGPCATH1 | 2  | -----                                                          |
| PpaGPCATH2 | 2  | -----                                                          |
| SmoGPCATH1 | 9  | -----                                                          |
| SmoGPCATH2 | 3  | -----                                                          |
| ZmaGPCATH1 | 9  | -----                                                          |
| ZmaGPCATH2 | 9  | -----                                                          |
| OsaGPCATH  | 9  | -----                                                          |
| MacGPCATH1 | 9  | -----                                                          |
| StuGPCATH1 | 9  | -----                                                          |
| StuGPCATH2 | 9  | -----                                                          |
| RcoGPCAT   | 9  | -----                                                          |
| AthGPCAT   | 9  | -----                                                          |
| BvuGPCATH  | 22 | -----VR-E-----QI-LKSLLFQSI-                                    |
| NnuGPCATH  | 9  | -----                                                          |
| EguGPCATH  | 9  | -----                                                          |
| NadGPCATH  | 10 | -----                                                          |
| AtrGPCATH  | 8  | -----                                                          |
| LtuGPCATH  | 16 | -----                                                          |
| AfiGPCATH  | 10 | -----                                                          |
| KfiGPCATH  | 9  | -----                                                          |
| EmuGPCATH  | 11 | -----                                                          |
| OviGPCATH  | 10 | -----                                                          |
| SpuGPCATH  | 15 | -----                                                          |
| CgiGPCATH  | 16 | -----                                                          |
| LgiGPCATH1 | 15 | -----                                                          |
| LgiGPCATH2 | 16 | -----KP-----                                                   |
| LcoGPCATH  | 23 | -----SS--NG-DD--LS-DF-----EHDLDVI-----EGW-                     |
| MciGPCATH1 | 27 | -----SS--SG-----IK-NF-----G--NEDMFSL-----DEW-                  |
| MciGPCATH2 | 19 | -----TL--LS-ED--ST-EY-----D--TDELTTV-----DSW-                  |
| MveGPCATH  | 70 | -----ILTQLSFS-----                                             |
| UmaGPCATH  | 60 | -----GIDLLGSSASA-----AAL-                                      |
| LbiGPCATH  | 12 | -----                                                          |
| SpoGPCATH  | 19 | -----E-DN-----D--YGLHGLD-----DSV-                              |
| SceGPCAT   | 15 | -----NSV-----SLT-                                              |
| LthGPCATH  | 17 | -----EPMKV-----TLA-                                            |
| PkuGPCATH  | 22 | -----SS-----NAYADL-----S--SSDAPFF-----EGV-                     |
| NcrGPCATH  | 72 | -----SF--SG--SISSTL-HD-----E--WDVFPPL-----DRL-                 |
| ChaGPCATH  | 64 | -----SH--IG--S--QSL-QE-----D--W--EVPL-----DKL-                 |
| Ac1GPCATH  | 66 | -----S-----FSY-QD-----D--WDTFPPL-----DKL-                      |
| Cg1GPCATH  | 69 | -----SF--SG--S--SSY-QE-----D--WDPFPPL-----DRL-                 |
| BbaGPCATH  | 66 | -----SF--SG--S--SSY-HD-----D--WDSLPPPL-----DRL-                |
| DdiGPCATH1 | 35 | -----DYN--LE--DSSN-D-ENSGDGDGGGVVESDDKNLKRKR--SKRPTTL-----GESN |
| DdiGPCATH2 | 27 | -----VG--SGSSISRLQH-DS-----N--NN-----NSP-                      |
| AsuGPCATH  | 18 | -----ELSPSSR-RL-----K--DK-----SKD-                             |
| EdiGPCATH  | 15 | -----                                                          |
| AcaGPCATH1 | 18 | -----EQ--VE-EL-----R--DENPSTV-----SED-                         |
| AcaGPCATH2 | 24 | -----QH--LH--DESE-EQHHSQNDSE-----                              |
| PbrGPCATH  | 62 | SADERMTE-DEVGASDVA--T--DSE-ED-----D--ER-----SASE-              |
| NgrGPCATH1 | 39 | -----                                                          |
| NgrGPCATH2 | 23 | -----                                                          |
| MbrGPCATH  | 23 | -----A-----S-Q-----VI-----EDI-                                 |
| BsaGPCATH  | 36 | -----ERAMPWA-----                                              |
| OtaGPCATH  | 26 | -----                                                          |
| MpuGPCATH1 | 25 | ---DALSDDDENGA-TTSSDEG-V--GS--P-----R--GH--VVAHHA-----         |
| MpuGPCATH2 | 9  | -----                                                          |
| MspGPCATH1 | 14 | -----ENGY-MSPTSDG-E--DS--P-----R--EW--RR--RNPLAP-              |
| MspGPCATH2 | 9  | -----                                                          |
| CreGPCATH  | 13 | -----                                                          |
| CowGPCATH  | 99 | -----ESEQDHA-----                                              |
| CmeGPCATH  | 21 | -----SS--AF-PD--SE-AY-----YEPDL-----LSL-                       |

*Cloning and characterization of GPCATs*

|            |     |                                                                                  |  |
|------------|-----|----------------------------------------------------------------------------------|--|
| PpaGPCATH1 | 2   | -----                                                                            |  |
| PpaGPCATH2 | 2   | -----                                                                            |  |
| SmoGPCATH1 | 9   | -----                                                                            |  |
| SmoGPCATH2 | 3   | -----                                                                            |  |
| ZmaGPCATH1 | 9   | -----                                                                            |  |
| ZmaGPCATH2 | 9   | -----                                                                            |  |
| OsaGPCATH  | 9   | -----                                                                            |  |
| MacGPCATH1 | 9   | -----                                                                            |  |
| StuGPCATH1 | 9   | -----                                                                            |  |
| StuGPCATH2 | 9   | -----                                                                            |  |
| RcoGPCATH  | 9   | -----                                                                            |  |
| AthGPCATH  | 9   | -----                                                                            |  |
| BvuGPCATH  | 36  | -----                                                                            |  |
| NnuGPCATH  | 9   | -----                                                                            |  |
| EguGPCATH  | 9   | -----                                                                            |  |
| NadGPCATH  | 10  | -----                                                                            |  |
| AtrGPCATH  | 8   | -----                                                                            |  |
| LtuGPCATH  | 16  | -----                                                                            |  |
| AfiGPCATH  | 10  | -----                                                                            |  |
| KfiGPCATH  | 9   | -----                                                                            |  |
| EmuGPCATH  | 11  | -----                                                                            |  |
| OviGPCATH  | 10  | -----                                                                            |  |
| SpuGPCATH  | 15  | -----                                                                            |  |
| CgiGPCATH  | 16  | -----                                                                            |  |
| LgiGPCATH1 | 15  | -----                                                                            |  |
| LgiGPCATH2 | 18  | -----                                                                            |  |
| LcoGPCATH  | 43  | -----TTADFISE-----                                                               |  |
| MciGPCATH1 | 46  | -----ETSDFISE-----                                                               |  |
| MciGPCATH2 | 40  | -----SSHDFVAK-----                                                               |  |
| MveGPCATH  | 78  | -----                                                                            |  |
| UmaGPCATH  | 74  | -----                                                                            |  |
| LbiGPCATH  | 12  | -----                                                                            |  |
| SpoGPCATH  | 33  | -----                                                                            |  |
| SceGPCATH  | 21  | -----                                                                            |  |
| LthGPCATH  | 25  | -----                                                                            |  |
| PkuGPCATH  | 41  | -----                                                                            |  |
| NcrGPCATH  | 95  | -----                                                                            |  |
| CbaGPCATH  | 83  | -----                                                                            |  |
| AcIGPCATH  | 83  | -----                                                                            |  |
| CglGPCATH  | 90  | -----                                                                            |  |
| BbaGPCATH  | 87  | -----                                                                            |  |
| DdiGPCATH1 | 82  | KDGETANSVSI SAGTSKSNISSPLVDGADILSKPNSSPTSSSLSGSNSAN--GFLSDDDDLLNGNEQLNENHNTNSTNG |  |
| DdiGPCATH2 | 47  | -----LVPTSC-----                                                                 |  |
| AsuGPCATH  | 33  | -----SDKYLD-----                                                                 |  |
| EdiGPCATH  | 15  | -----                                                                            |  |
| AcaGPCATH1 | 35  | -----TNDAFVD-----                                                                |  |
| AcaGPCATH2 | 42  | -----NATQPERAEDLA-----                                                           |  |
| PbrGPCATH  | 93  | -----                                                                            |  |
| NgrGPCATH1 | 39  | -----EDED-----                                                                   |  |
| NgrGPCATH2 | 23  | -----VTTA-----                                                                   |  |
| MbrGPCATH  | 31  | -----R--NFMSDL-----                                                              |  |
| BsaGPCATH  | 43  | -----SFS-----                                                                    |  |
| OtaGPCATH  | 26  | -----                                                                            |  |
| MpuGPCATH1 | 56  | -----                                                                            |  |
| MpuGPCATH2 | 9   | -----                                                                            |  |
| MspGPCATH1 | 40  | -----                                                                            |  |
| MspGPCATH2 | 9   | -----                                                                            |  |
| CreGPCATH  | 13  | -----                                                                            |  |
| CowGPCATH  | 106 | -----SCD-----                                                                    |  |
| CmeGPCATH  | 39  | -----                                                                            |  |

*Cloning and characterization of GPCATs*

|            |     |                                                                            |
|------------|-----|----------------------------------------------------------------------------|
| PpaGPCATH1 | 2   | -----                                                                      |
| PpaGPCATH2 | 2   | -----                                                                      |
| SmoGPCATH1 | 9   | -----                                                                      |
| SmoGPCATH2 | 3   | -----                                                                      |
| ZmaGPCATH1 | 9   | -----                                                                      |
| ZmaGPCATH2 | 9   | -----                                                                      |
| OsaGPCATH  | 9   | -----                                                                      |
| MacGPCATH1 | 9   | -----                                                                      |
| StuGPCATH1 | 9   | -----                                                                      |
| StuGPCATH2 | 9   | -----                                                                      |
| RcoGPCATH  | 9   | -----                                                                      |
| AthGPCATH  | 9   | -----                                                                      |
| BvuGPCATH  | 36  | -----SLCKIPSI-----                                                         |
| NnuGPCATH  | 9   | -----                                                                      |
| EguGPCATH  | 9   | -----                                                                      |
| NadGPCATH  | 10  | -----                                                                      |
| AtrGPCATH  | 8   | -----                                                                      |
| LtuGPCATH  | 16  | -----                                                                      |
| AfiGPCATH  | 10  | -----                                                                      |
| KfiGPCATH  | 9   | -----                                                                      |
| EmuGPCATH  | 11  | -----                                                                      |
| OviGPCATH  | 10  | -----                                                                      |
| SpuGPCATH  | 15  | -----                                                                      |
| CgiGPCATH  | 16  | -----                                                                      |
| LgiGPCATH1 | 15  | -----                                                                      |
| LgiGPCATH2 | 18  | -----                                                                      |
| LcoGPCATH  | 51  | -----NDFDMI--E-----                                                        |
| MciGPCATH1 | 54  | -----NDFDMI--D-----                                                        |
| MciGPCATH2 | 48  | -----DDYAMI--G-----                                                        |
| MveGPCATH  | 78  | -----L--D-----                                                             |
| UmaGPCATH  | 74  | -----PLSDF--E-----                                                         |
| LbiGPCATH  | 12  | -----F--E-----                                                             |
| SpoGPCATH  | 33  | -----GFTDLF--D-----                                                        |
| SceGPCATH  | 21  | -----SLLEFL--D-----                                                        |
| LthGPCATH  | 25  | -----NWVEFL--D-----                                                        |
| PkuGPCATH  | 41  | -----TLDDL--Q-----                                                         |
| NcrGPCATH  | 95  | -----TVLDDL--D-----                                                        |
| CbaGPCATH  | 83  | -----TFFDIF--D-----                                                        |
| Ac1GPCATH  | 83  | -----TVFDLL--D-----                                                        |
| Cg1GPCATH  | 90  | -----TVLDIL--D-----                                                        |
| BbaGPCATH  | 87  | -----TVLDDL--D-----                                                        |
| DdiGPCATH1 | 160 | ATNNNNNNNNNSGNSPSHQSSSEL-----                                              |
| DdiGPCATH2 | 53  | -----D--S-----                                                             |
| AsuGPCATH  | 39  | -----E-----                                                                |
| EdiGPCATH  | 15  | -----                                                                      |
| AcaGPCATH1 | 42  | -----A-----                                                                |
| AcaGPCATH2 | 54  | -----LQIASGK-----                                                          |
| PbrGPCATH  | 93  | -----VFGQIV--D-----                                                        |
| NgrGPCATH1 | 43  | -----TLSDQL-----                                                           |
| NgrGPCATH2 | 27  | -----TITPT-----                                                            |
| MbrGPCATH  | 38  | -----DFATQQ--D-----                                                        |
| BsaGPCATH  | 46  | -----KPDA--GGGS-----                                                       |
| OtaGPCATH  | 26  | -----                                                                      |
| MpuGPCATH1 | 56  | -----                                                                      |
| MpuGPCATH2 | 9   | -----                                                                      |
| MspGPCATH1 | 40  | -----FFK-----                                                              |
| MspGPCATH2 | 9   | -----                                                                      |
| CreGPCATH  | 13  | -----                                                                      |
| CowGPCATH  | 109 | -----HLLHDDHAALLDAA--DDLLAPGIQLQGSVNDMNDRVESYVMQTLDRIASGLSDSDEDDPDGAD----- |
| CmeGPCATH  | 39  | -----SLSDIF--T-----                                                        |

*Cloning and characterization of GPCATs*

|            |     |                                                                                  |
|------------|-----|----------------------------------------------------------------------------------|
| PpaGPCATH1 | 2   | -----                                                                            |
| PpaGPCATH2 | 2   | -----                                                                            |
| SmoGPCATH1 | 9   | -----                                                                            |
| SmoGPCATH2 | 3   | -----                                                                            |
| ZmaGPCATH1 | 9   | -----                                                                            |
| ZmaGPCATH2 | 9   | -----                                                                            |
| OsaGPCATH  | 9   | -----                                                                            |
| MacGPCATH1 | 9   | -----                                                                            |
| StuGPCATH1 | 9   | -----                                                                            |
| StuGPCATH2 | 9   | -----                                                                            |
| RcoGPCATH  | 9   | -----                                                                            |
| AthGPCATH  | 9   | -----                                                                            |
| BvuGPCATH  | 45  | -----                                                                            |
| NnuGPCATH  | 9   | -----                                                                            |
| EguGPCATH  | 9   | -----                                                                            |
| NadGPCATH  | 10  | -----                                                                            |
| AtrGPCATH  | 8   | -----                                                                            |
| LtuGPCATH  | 16  | -----                                                                            |
| AfiGPCATH  | 10  | -----                                                                            |
| KfiGPCATH  | 9   | -----                                                                            |
| EmuGPCATH  | 11  | -----                                                                            |
| OviGPCATH  | 10  | -----                                                                            |
| SpuGPCATH  | 15  | -----                                                                            |
| CgiGPCATH  | 16  | -----                                                                            |
| LgiGPCATH1 | 15  | -----                                                                            |
| LgiGPCATH2 | 18  | -----                                                                            |
| LcoGPCATH  | 58  | -----                                                                            |
| MciGPCATH1 | 61  | -----                                                                            |
| MciGPCATH2 | 55  | -----                                                                            |
| MveGPCATH  | 80  | -----                                                                            |
| UmaGPCATH  | 81  | -----                                                                            |
| LbiGPCATH  | 14  | -----                                                                            |
| SpoGPCATH  | 40  | -----                                                                            |
| SceGPCATH  | 28  | -----                                                                            |
| LthGPCATH  | 32  | -----                                                                            |
| PkuGPCATH  | 48  | -----                                                                            |
| NcrGPCATH  | 102 | -----                                                                            |
| CbaGPCATH  | 90  | -----                                                                            |
| AcIGPCATH  | 90  | -----                                                                            |
| CglGPCATH  | 97  | -----                                                                            |
| BbaGPCATH  | 94  | -----                                                                            |
| DdiGPCATH1 | 185 | ----- PLLNLFQKFLNREAI -----                                                      |
| DdiGPCATH2 | 55  | -----                                                                            |
| AsuGPCATH  | 40  | -----                                                                            |
| EdiGPCATH  | 15  | -----                                                                            |
| AcaGPCATH1 | 43  | -----                                                                            |
| AcaGPCATH2 | 62  | ----- SKKSFFERFTVLWAQ -----                                                      |
| PhrGPCATH  | 100 | -----                                                                            |
| NgrGPCATH1 | 49  | ----- VVEDEEE-YAYY-DW -----                                                      |
| NgrGPCATH2 | 33  | ----- TTT----- T-NN -----                                                        |
| MbrGPCATH  | 45  | -----                                                                            |
| BsaGPCATH  | 54  | GHRSTT----- NTTATSSQQPDKATS ----- SEAT                                           |
| OtaGPCATH  | 26  | -----                                                                            |
| MpuGPCATH1 | 56  | -----                                                                            |
| MpuGPCATH2 | 9   | -----                                                                            |
| MspGPCATH1 | 43  | -----                                                                            |
| MspGPCATH2 | 9   | -----                                                                            |
| CreGPCATH  | 13  | AE-----                                                                          |
| CowGPCATH  | 170 | AVRDSSSHSDNPDNLQFYQQHDNEQTDRDASSIRRQQEKRASKRSVPSGADSDSEWVMSVPGSDARDLSDMDAGFTPSAS |
| CmeGPCATH  | 46  | -----                                                                            |



## Cloning and characterization of GPCATs

|            |     |                                                                    |
|------------|-----|--------------------------------------------------------------------|
| PpaGPCATH1 | 2   | -----                                                              |
| PpaGPCATH2 | 2   | -----                                                              |
| SmoGPCATH1 | 9   | ---SP-----                                                         |
| SmoGPCATH2 | 3   | -----                                                              |
| ZmaGPCATH1 | 9   | ---AAVP-----GA--P-----L--VA-----                                   |
| ZmaGPCATH2 | 9   | ---AATP-----L-----LA-----                                          |
| OsaGPCATH  | 9   | ---AAAV-----LT--N-----GG-----                                      |
| MacGPCATH1 | 9   | ---DEGE-----AF--QKVRH---RIA-DQS-----KR--VV-----                    |
| StuGPCATH1 | 9   | ---EDSN-----GHSF--GKVKQ---RFK-DRS-----                             |
| StuGPCATH2 | 9   | ---S-----F--GKVKQ---RFK-DRS-----                                   |
| RcoGPCATH  | 9   | ---NEFV-----SNGDSF--EKVKQ---RLK-DRS-----KK--VA-----                |
| AthGPCATH  | 9   | ---SNGL-----DSF--DAVKQ---RFK-DRS-----KK--VV-----                   |
| BvuGPCATH  | 68  | KVEEVN-----GHSF--QKVKQ---RLK-DRT-----                              |
| NnuGPCATH  | 9   | ---DGGD-----PF--PTVKQ---RFS-DRT-----KK--V-----                     |
| EguGPCATH  | 9   | ---DD-----GEAF--RKVRQ---RIA-QDS-----KR--VV-----                    |
| NadGPCATH  | 28  | EGEDCD-----AKPF--RKVRQ---KLV-----                                  |
| AtrGPCATH  | 8   | ---E-----AQE---AFR-----                                            |
| LtuGPCATH  | 39  | IVGGGE-----KESFR-KAVRK---RLS-DRT-----KK--VA-----                   |
| AfiGPCATH  | 31  | EVDGDR-----GQPF--RRVKQ---RFS-DRT-----KK--VA-----                   |
| KflGPCATH  | 9   | ---AEEATARSASTSDSET--EGVRQ---RRP-GDA-----EV--LA---QEPL-----WV---P- |
| EmuGPCATH  | 11  | -----                                                              |
| OviGPCATH  | 10  | -----                                                              |
| SpuGPCATH  | 15  | -----TEVAE---QDDG-----TK--WAQ---PAKD-----                          |
| CgiGPCATH  | 16  | -----EEE-VTY---E-----                                              |
| LgiGPCATH1 | 15  | -----YNTG-TSR---E-----                                             |
| LgiGPCATH2 | 18  | -----VDTVVTCT-NDDG-----NTKPVAS---VTINGFIP-RSS---S-----             |
| LcoGPCATH  | 61  | -----AA-L-EQVTH---QLN-DKQ-----RE--IR---AR-----STEWTTTKT-           |
| MciGPCATH1 | 64  | -----AA-L-DQVTN---QLE-DKQ-----RE--FI---SK-----SSEWTKTR-            |
| MciGPCATH2 | 58  | -----AA-L-EQVTL---QIR-DVK-----NE--IK---AL-----LSTEWTSMTQ-          |
| MveGPCATH  | 84  | -----QN-L-EEELT---DLP-VLANQIYKTLRQD---LK---KNKQ---K-LKHQM---K-     |
| UmaGPCATH  | 85  | -----PR-I-DLAGR---KWS-AFS---GDMRSR---AR---RRRE---E-LVRKA-----      |
| LbiGPCATH  | 18  | -----SR-V-DLQOR---KIQ-KHS-----DR--LK---MKAE---E-TFKIK---E-         |
| SpoGPCATH  | 45  | -----RV-Y-SWVHK---HYN-QKK-----GQ---LKHGVSQRKN---K-L-----           |
| SceGPCATH  | 33  | -----VV-S-KYYHG---SHLSKAE---QK---LR---NFEG---F-RRRKPHEHD-SH-       |
| LthGPCATH  | 37  | -----AQ-S-QVPR---KYLTRAR-----RR--LK---S-----ARPRQ-KL-              |
| PkuGPCATH  | 53  | -----LE-L-RKKKD---DTYKWVR---KV---YN---DK-----                      |
| NcrGPCATH  | 107 | -----QQ-L-EKQOR---GIH-ART-----EK--MR---KSGE---A-LKEKSAIARERMV-     |
| ChaGPCATH  | 95  | -----AK-L-EKWQA---TLQ-AQK-----EK--LA---RQOE---R-IRSSGNAKDRAM-      |
| Ac1GPCATH  | 95  | -----QK-L-EKWQH---AIN-VQK-----EK--VR---KQRE---K-LKYTSMHAKDRVV-     |
| Cg1GPCATH  | 102 | -----QQ-L-EKQOK---GIS-AQT-----EK--VR---KSRQ---A-FGNKSRIARERMV-     |
| BbaGPCATH  | 99  | -----QQ-L-EKQOK---GIS-AQT-----DK--VR---RSRD---A-LKSKTQARHRMV-      |
| DdiGPCATH1 | 200 | -----KVQQ---RHS-AIN-----NR--LQ---R-----L-KKVVD                     |
| DdiGPCATH2 | 55  | -----P-T-SNFK-----                                                 |
| AsuGPCATH  | 45  | -----SP-I-GQFKK---SID-DRR-----                                     |
| EdiGPCATH  | 15  | -----                                                              |
| AcaGPCATH1 | 48  | -----RE-L-DLAD---ALQ-SLP-----V-----GFK-                            |
| AcaGPCATH2 | 77  | -----RKVID---KLL-T-S-----PH--VK---R-----                           |
| PhrGPCATH  | 105 | -----VR-L-ENQOT---TLE-TG-----R-GA---GLVRD-----AR-                  |
| NgrGPCATH1 | 62  | -----ETVGS---SLQ-NQE-----EE--LI---DLWM---RINDAFSDRKKSLVN           |
| NgrGPCATH2 | 39  | -----N-----NT--TT---TTSS---SP-----KQ                               |
| MbrGPCATH  | 48  | -----AAPLSVNMNR---RLT-IL-----R-                                    |
| BsaGPCATH  | 79  | -----                                                              |
| OtaGPCATH  | 26  | -----AVAR---AIR-RK-----SG--ELLKS-----AK-                           |
| MpuGPCATH1 | 56  | -----RGVQ---FFK-RP-----VE--NV-----                                 |
| MpuGPCATH2 | 9   | ---PNKV---A-----                                                   |
| MspGPCATH1 | 43  | -----RPRRP---SLP-EG-----AR--AI-----                                |
| MspGPCATH2 | 9   | ---RSSE---E-----                                                   |
| CreGPCATH  | 15  | -----                                                              |
| CowGPCATH  | 279 | -----RS-R-RPSAA---HLD-RES-----EQ--AR---RLQK---SMSTSSI--GDRLID      |
| CmeGPCATH  | 48  | -----S-L-----                                                      |







Cloning and characterization of GPCATs

|            |     |                                                         |                                              |
|------------|-----|---------------------------------------------------------|----------------------------------------------|
| PpaGPCATH1 | 30  | -----YCHGVVSFGTFCFL-----                                | LGSKPADLPEKLYC-FFFTTVAPLRNIIYYRIRKWHYFL----- |
| PpaGPCATH2 | 29  | -----YCHGVVSFGTFCFL-----                                | LGSRFDALPEKLYC-FFFTTVAPLRNIIYYRIRKWHYFL----- |
| SmoGPCATH1 | 48  | -----YCHGVFCFGTFCV-----                                 | MGSRPEHEIPYLYC-FFFTTVAPLRNIIYYRIRKWHYFL----- |
| SmoGPCATH2 | 30  | -----YCHGVFCFGTFCFL-----                                | LGSRPQDIPYLYC-TFFTVAPLRNIIYYRIRKWHYFL-----   |
| ZmaGPCATH1 | 58  | -----HLIGVIGFGGFCFL-----                                | LGAREQDIPYVYC-FFYVIFVPLRNIIYYRIRKWHYFL-----  |
| ZmaGPCATH2 | 55  | -----HLIGVIGFGGFCFL-----                                | LGAREQDIPYVYC-FFYVIFVPLRNIIYYRIRKWHYFL-----  |
| OsaGPCATH  | 57  | -----HLIGVIGFGTFCFL-----                                | LGAREQDIPYVYC-FFYVIFVPLRNIIYYRIRKWHYFL-----  |
| MacGPCATH1 | 69  | -----HLIGVIGFGAFCFL-----                                | LGAREQDIPYVYC-FFYVIFVPLRNIIYYRIRKWHYFL-----  |
| StuGPCATH1 | 61  | -----HLMGVIGFGAFCFL-----                                | LGAREKDIRYVYC-FFYVIFVPLRNIIYYRIRKWHYFL-----  |
| StuGPCATH2 | 55  | -----HLIGVIGFGAFCFL-----                                | LGAREQDIRYAYS-FFYVIFVPLRNIIYYRIRKWHYFL-----  |
| RcoGPCATH  | 73  | -----HLIGVIGFGGFCFL-----                                | LGAREQDIPYVYC-FFYVIFVPLRNIIYYRIRKWHYFL-----  |
| AthGPCATH  | 70  | -----HLVGVIGFGGFCFL-----                                | LGAREQDIPLVYC-FFYVIFVPLRNIIYYRIRKWHYFL-----  |
| BvuGPCATH  | 125 | -----YICGVIGFGGFCFL-----                                | LGAREQDIPYVYC-FFYVIFVPLRNIIYYRIRKWHYFL-----  |
| NnuGPCATH  | 67  | -----HLIGVIGFGAFCFL-----                                | LGSRPQDIPYVYC-FFYVIFVPLRNIIYYRIRKWHYFL-----  |
| EguGPCATH  | 73  | -----HLMGVIGFGAFCFL-----                                | LGAREQDIPYVYC-FFYVIFVPLRNIIYYRIRKWHYFL-----  |
| NadGPCATH  | 85  | -----HLIGVIGFGAFCFL-----                                | LGSRPQDIPYVYC-VFYVTFVPLRNIIYYRIRKWHYFL-----  |
| AtrGPCATH  | 54  | -----HLIGVIGFGAFCFL-----                                | LGSRPQDIPYIYC-FFYVTFVPLRNIIYYRIRKWHYFL-----  |
| LtuGPCATH  | 104 | -----HLIGVIGFGAICFL-----                                | LGAREQDIPYVYC-FFYVTFVPLRNIIYYRIRKWHYFL-----  |
| AfiGPCATH  | 106 | -----HLIGVIGFGSFCFL-----                                | LGAREQDIPYVYC-FFYVTFVPLRNIIYYRIRKWHYFL-----  |
| KflGPCATH  | 91  | -----YSIGVICFGLFCFL-----                                | VGAKPQVLEPYEYC-FFLFVALPLRNIIYYRIRKWHYFL----- |
| EmuGPCATH  | 38  | -----FVLSVTLITVVFVCF-----                               | AVVREPALILYIES-GFFVAVVFRVINYWRSNIILEM-----   |
| OviGPCATH  | 20  | -----FVLCATAFVLDSTFC-----                               | FVVREALILYIES-GFFVAVVFRVINYWRSNIILEM-----    |
| SpuGPCATH  | 82  | -----FVVSILITIVVCCS-----                                | MMSFQWLEPYLYT-AYLSVLIPIRAYKIIYRIRKWHYFL----- |
| CgiGPCATH  | 91  | -----YVVAVITLIFLTHA-----                                | TVYAQWLEPYIYA-VSTPIILILRVIMYWKNKWQYFL-----   |
| LgiGPCATH1 | 68  | -----YVLSIGTILLLTHS-----                                | LMASQWLEPYIYT-ISTPCLLILRTIYWKIRKWHYFL-----   |
| LgiGPCATH2 | 94  | -----YVLSIGTILLLTHS-----                                | LMASQWLEPYIYT-ISTPCLLILRTIYWKIRKWHYFL-----   |
| LcoGPCATH  | 136 | -----FVVGGNACVSPAL-----                                 | AARLPEWLEPYIYT-IQSLYLLSLRLIYRIRKWHYFL-----   |
| MciGPCATH1 | 139 | -----FVVGGNACVAPAL-----                                 | ALRYPSLEPSIYS-SQLVLLILIRVVIYRIRKWHYFL-----   |
| MciGPCATH2 | 134 | -----FVVGVNTCITPVL-----                                 | AARLPEWLEPYIYT-VQLCYLITLRFVYRIRKWHYFL-----   |
| MveGPCATH  | 166 | -----FTVGMFECCCTPFL-----                                | VAQYPEWLELVHT-VQVATLIMRVFLYRIRKWHYFL-----    |
| UmaGPCATH  | 161 | -----FVVGVCNIVVSSLV-----                                | FALRELEPTLYS-LLAYFPLRNVSYRIRKWHYFL-----      |
| LbiGPCATH  | 92  | -----FFFCVMSLLSALL-----                                 | FGIAPHWLVHAYS-VQGLYLLPLRAYRYRIRKWHYFL-----   |
| SpoGPCATH  | 115 | -----FALGVSTCILTALL-----                                | VGMAPESVHLIYT-IQLFVYVPLRNIIYYRIRKWHYFL-----  |
| SceGPCATH  | 116 | -----YPTFLFNFFIGL-----                                  | MGRPEWVHVIYT-ILFFVLMPIRYTYRIRKWHYFL-----     |
| LthGPCATH  | 111 | -----YPTFLFHFAIGL-----                                  | IGKYPSEWVHVIYT-GMLVLLMPVRYTYRIRKWHYFL-----   |
| PkuGPCATH  | 118 | -----FSFSVYMLFFIGL-----                                 | IGHSEPYHILYS-VMFALMPLRILTYRIRKWHYFL-----     |
| NcrGPCATH  | 188 | -----FIFGVNIFISGL-----                                  | IGAPPEWFHVIYT-VQIYFMPIRYRYRIRKWHYFL-----     |
| ChaGPCATH  | 176 | -----FISAVNIFISGL-----                                  | VGAVEQYFYWYT-IQLYFMPIRAYTYRIRKWHYFL-----     |
| AclGPCATH  | 176 | -----FISAVNIFISGL-----                                  | IGAYPEYFYIES-VQLAYFMPIRYRYRIRKWHYFL-----     |
| CglGPCATH  | 183 | -----FICGVNIFVSGL-----                                  | IGGYPEYFHLIYT-IQVYFMPIRYRYRIRKWHYFL-----     |
| BbaGPCATH  | 180 | -----FICGVNIFISGL-----                                  | IGGYPEYFHLIYT-VQLYFMPIRMFTYRIRKWHYFL-----    |
| DdiGPCATH1 | 268 | -----FTVGLIIMVSEFV-----                                 | LLKSPQLFYLYYT-VLIFPLMAREVMIYRIRKWHYFL-----   |
| DdiGPCATH2 | 107 | -----FVIGVNLICVISEF-----                                | CKKPYLYQYFES-GEYVLFATRIILYRIRKWHYFL-----     |
| AsuGPCATH  | 104 | -----FVNGVNLICVISEF-----                                | YGRAPKYLEDVFA-VEFCLGFLRLIYRIRKWHYFL-----     |
| EdiGPCATH  | 55  | -----FVCGVLTLLTQHL-----                                 | LSALPQFMPIYV-ILIFPLGARFIYRIRKWHYFL-----      |
| AcaGPCATH1 | 104 | -----FVAGVTNALTFLL-----                                 | LGRHPEWLEIYIYT-ILKAFLLITIRYVYRIRKWHYFL-----  |
| AcaGPCATH2 | 138 | -----FMMGLILMLVTEAL-----                                | L-TRKNAMYQBYT-VMFPLMVFREASYRIRKWHYFL-----    |
| PhrGPCATH  | 170 | -----FTVGLIGSLITVCL-----                                | LGRSSDLVKKIYT-YLIVLLISLRIYLYRIRKWHYFL-----   |
| NgrGPCATH1 | 140 | -----FTVGLIIMVSEFV-----                                 | LAKYFYLLEDIYI-VMSVILMVRIFHYRIRKWHYFL-----    |
| NgrGPCATH2 | 94  | -----FTVGLIIMVSTTL-----                                 | FCHSEKYLEIYI-LWMLPLMIYRIRKWHYFL-----         |
| MbrGPCATH  | 116 | -----FVACVSTLALALEFL-----                               | LLQETRYLPEYV-ALMFPILMARVFLYRIRKWHYFL-----    |
| BsaGPCATH  | 102 | -----YTSVINAVALTALL-----                                | FGVVEHYFHWHS-PKALMYLAHRNYTFIRKWHYFL-----     |
| OtaGPCATH  | 84  | -----FCVGVFGIMTEK-----                                  | ATRAPEKFWMRYA-FAMPALVCRAYRYRIRKWHYFL-----    |
| MpuGPCATH1 | 109 | -----FTVGVVGLMVTQHL-----                                | ATTREGLFWLYL-VVAPFVAFANVATYRIRKWHYFL-----    |
| MpuGPCATH2 | 50  | -----FFVGVNIFLTAFL-----                                 | LGNTPEYVWVQL-LKNVAVSTASVIRKWHYFL-----        |
| MspGPCATH1 | 94  | -----FTVGVVGLMVTQFL-----                                | ATEHEEYFWVYFL-CSAPLFIYRIRKWHYFL-----         |
| MspGPCATH2 | 42  | -----FALGLFNWGSALC-----                                 | LGRFVQYVWVQV-VKSMNYLSIRKWHYFL-----           |
| CreGPCATH  | 55  | GAESDVVEFLDATTGGPGVVAEALDMHEVFHLEEQAAALQVGLGEAVVTE----- | -----QKRRR-----                              |
| CowGPCATH  | 394 | -----FTGFVASFLVTEFL-----                                | LLRYEQWVWLYA-VCIPLVGTIRVLYRIRKWHYFL-----     |
| CmeGPCATH  | 88  | -----FVIGLNLVLFTEK-----                                 | ILRQEARVWQVYL-YQLTPLLILRYSYRIRKWHYFL-----    |

Cloning and characterization of GPCATs

|            |     |                                                                         |
|------------|-----|-------------------------------------------------------------------------|
| PpaGPCATH1 | 80  | -----IDFCYYANAFVVFV-----ML-LF-----Y-----P-T--ND---KLFLLCFSESEGP         |
| PpaGPCATH2 | 79  | -----FDFCYYANTFVVV-----ML-LY-----F-----P-K--ND---KLFLLVCFSESEGP         |
| SmoGPCATH1 | 98  | -----IDFCYYANVFMA-----ML-LV-----F-----P-N--NE---KLFMVCFSSESEGP          |
| SmoGPCATH2 | 80  | -----FDFCYYANAFMA-----ML-LY-----F-----P-K--NE---KLFMVCFAFSESEGP         |
| ZmaGPCATH1 | 108 | -----IDFCYYANTFLLV-----ML-LF-----Y-----P-K--DE---KLFMVCFSSESEGP         |
| ZmaGPCATH2 | 105 | -----IDFCYYANTFLLV-----ML-LF-----Y-----P-E--DE---KLFMVCFSSESEGP         |
| OsaGPCATH  | 118 | ALQFQAIDCIDFCYYANTFLLV-----ML-LF-----Y-----P-K--DE---KLFMVCFSSESEGP     |
| MacGPCATH1 | 119 | -----IDFCYYANTFLLV-----ML-LF-----F-----P-K--NE---KLFMVCFSSESEGP         |
| StuGPCATH1 | 111 | -----IDFCYYANTFLLV-----ML-LF-----F-----P-T--KE---KLFMVCFSSESEGP         |
| StuGPCATH2 | 105 | -----IDFCYYANTFLLV-----ML-LG-----F-----P-T--NE---TFFMVCFSSESEGP         |
| RcoGPCAT   | 123 | -----IDFCYYANTFLLV-----DL-LL-----Y-----P-K--DE---KLFMVCFSSESEGP         |
| AthGPCAT   | 120 | -----IDFCYYANTFLLV-----DL-LL-----Y-----P-K--NE---KLFMVCFSSESEGP         |
| BvuGPCATH  | 175 | -----IDFCYYANTFLLV-----AL-LM-----Y-----P-K--NE---KLFMVCFSSESEGP         |
| NnuGPCATH  | 117 | -----IDFCYYANTFLLV-----ML-IL-----Y-----P-R--NE---KFFMVCFSSESEGP         |
| EguGPCATH  | 123 | -----IDFCYYANTFLLV-----VL-LF-----F-----P-K--NE---KLFMVCFSSESEGP         |
| NadGPCATH  | 135 | -----IDFCYYANTFLLV-----ML-LL-----Y-----P-R--NE---KLFMVCFSSESEGP         |
| AtrGPCATH  | 104 | -----IDFCYYANTFLLV-----ML-LL-----Y-----P-K--NE---KLFMVCFSSESEGP         |
| LtuGPCATH  | 154 | -----IDFCYYANTFLLV-----ML-LF-----Y-----P-R--NE---KLFMVCFSSESEGP         |
| AfiGPCATH  | 156 | -----IDFCYYANTFLLV-----ML-LF-----Y-----P-R--NE---KLFMVCFSSESEGP         |
| KflGPCATH  | 141 | -----IDFCYYANAFVVF-----L-LV-----Q-----P-D--NE---FLFMICFAFSESEGP         |
| EmuGPCATH  | 88  | -----IGPCYLVNVYTL-----F-LWA-----V-----P-D--SR---PVFLVLEGLANST           |
| OviGPCATH  | 70  | -----IDTCYLINLISL-----L-LWA-----H-----P-T--CH---KLFQVQGLANAH            |
| SpuGPCATH  | 132 | -----ADFCYYANAFSL-----F-LWA-----A-----P-Y--KS---NYFMVVEGVVNGP           |
| CgiGPCATH  | 141 | -----IDFCYYANIFWYS-----F-LWV-----V-----P-Y--NE---KFFAVVEALSNGP          |
| LgiGPCATH1 | 118 | -----IDFCYYGNVWYL-----F-LWI-----W-----P-Q--HG---NIFMASFAVANGP           |
| LgiGPCATH2 | 144 | -----IDFCYYGNIFWFA-----F-LWI-----A-----P-H--HG---DLFVAFALANGP           |
| LcoGPCATH  | 186 | -----FDLCYFVNAMTLL-----F-LWV-----F-----P-G--SR---AMFIATYCLTNGP          |
| MciGPCATH1 | 189 | -----FDICYFVNAMTLL-----F-LWA-----Y-----P-T--SK---LLFVASFMTNGP           |
| MciGPCATH2 | 184 | -----FDLCYFVNLTLL-----F-LWV-----F-----P-S--ST---LLYTAATFTLNGP           |
| MveGPCATH  | 216 | -----IDMCYFVNNAVLL-----Y-LYV-----F-----P-Q--SQ---ALLGAVLLSLGP           |
| UmaGPCATH  | 211 | -----FDLCYFVLNVALL-----F-LWV-----F-----P-S--SE---FLFTVVCYCAHGP          |
| LbiGPCATH  | 142 | -----FDLCYFVTINNFV-----Y-LWL-----F-----P-S--SP---ALFVACYCLSHCA          |
| SpoGPCATH  | 165 | -----ADFCYFVGNILLLV-----Y-LWI-----F-----P-E--SR---FLFLLSYSSISYGT        |
| SceGPCAT   | 166 | -----ADFCYFVNMLCCL-----F-LWI-----F-----P-Y--SY---SLFQSCFAFTFTCT         |
| LthGPCATH  | 161 | -----ADLCYFVNLMVLL-----F-VWV-----W-----P-D--SV---FLYQSCFAFTFTGT         |
| PkuGPCATH  | 168 | -----ADLCYFVNYLTL-----Y-LWI-----L-----P-D--SQ---SLYVACCSFSWGS           |
| NcrGPCATH  | 238 | -----ADLCYFVNFLLL-----S-LWV-----F-----P-G--SK---FLFTAVYCLAYGN           |
| ChaGPCATH  | 226 | -----ADLCYFVNFLLS-----S-LWA-----F-----P-R--SK---FLFVSAYCLAYGN           |
| AclGPCATH  | 226 | -----ADLCYFVNMLCML-----S-LWV-----F-----P-R--SK---FLFVSTFCLTFGN          |
| CglGPCATH  | 233 | -----ADLCYFVNFLML-----S-LWA-----F-----P-N--SK---FLFTAVYCLAFGN           |
| BbaGPCATH  | 230 | -----ADLCYFVNVLML-----S-LWA-----F-----P-S--SK---FLFTAFAFCLAFGN          |
| DdiGPCATH1 | 318 | -----IDFCYLCQIILLF-----Y-LFG-----HQYILGEK-V--LP---NLFKLVFALSNGP         |
| DdiGPCATH2 | 157 | -----FDFCYFANLMLLF-----F-LYG-----L-----P-D--RQ---WYFLVTCFCLANGP         |
| AsuGPCATH  | 154 | -----EDFCYFANFLLW-----Y-T-HGPE-----YV-----R-S--ST---VYFQLVFCFCNGP       |
| EdiGPCATH  | 105 | -----IDFCYFCQITLL-----C-LPS-----L-----N-TEYIS---FLFQVAFVESHGP           |
| AcaGPCATH1 | 154 | -----FDFCYYANIFVLL-----Y-LHF-----F-----P-K--SE---TMFICFAFCTGP           |
| AcaGPCATH2 | 187 | -----IDFCYFCQIILLF-----F-LYW-----H-----S-S--NP---IYFQVFECLSNGP          |
| PhrGPCATH  | 220 | -----IDFCYFVTGIVYM-----Y-LYL-----Y-----P-K--SS---TLFVHVFAFANGP          |
| NgrGPCATH1 | 190 | -----IDFCYFANFLLF-----Y-LGF-----Y-----T-N--SP---FLFLLNFVNSSGP           |
| NgrGPCATH2 | 144 | -----IDFCYFNLALMF-----F-LHF-----F-----P-T--SP---FLFVITFANNCGP           |
| MbrGPCATH  | 166 | -----ADFCYFNLWVTL-----C-LLL-----P-----SVF--GA---TARRSEVMCHGP            |
| BsaGPCATH  | 152 | -----YDFCYFANGTLL-----Y-CWV-----C-----P-W--SD---VYFQLVFCVCSNGP          |
| OtaGPCATH  | 134 | -----YDFCYFANVSVM-----F-LWT-----R-----R-R--SA---TAFRCIFAFANGP           |
| MpuGPCATH1 | 159 | -----IDFCYFANAFVFA-----Q-LV-----N-----P-G--SA---FLFRTTFAYATGP           |
| MpuGPCATH2 | 100 | -----IDLCHVLGFFYLV-----I-AFAGLLASASPHLHAIFAP-----T-S--SK---LFFVAFGIANGP |
| MspGPCATH1 | 144 | -----IDFCYYANLACFV-----H-LG-----A-----P-T--SG---FLFRSVFAFANGP           |
| MspGPCATH2 | 92  | -----IDLCHVLSFAYSIVGSISLAAWAI-----GLKEGLAPV-----T-S--SP---YVFRACFCLANGP |
| CreGPCATH  | 114 | -----YDFCYFANLMLV-----Q-LWL-----L-----P-R--WA---PLA-----                |
| CowGPCATH  | 444 | -----IDFCYFACCLLF-----Y-LFF-----Y-----P-T--SG---QLFEVFESSMNGP           |
| CmeGPCATH  | 138 | -----YDYCYFVQALVVA-----F-Y-FG-----W-----P-R--TQAWRQVVFVAFASANGP         |

Cloning and characterization of GPCATs

|            |     |                |          |                |      |            |                              |                   |
|------------|-----|----------------|----------|----------------|------|------------|------------------------------|-------------------|
| PpaGPCATh1 | 115 | LAWAIVWRGSLVFS | SSIDK    | ISVLIHLLP      | ---- | TVFFIIRW   | WDP-ITFAH                    | -----             |
| PpaGPCATh2 | 114 | LAWAIVWRGSLVFS | SSFDK    | LSVLIHLLP      | ---- | IVFYIIRW   | WDP-ASFSH                    | -----             |
| SmoGPCATh1 | 133 | LAWAIVWRGSLVFS | SSIDK    | ISVLIHLLP      | ---- | KFHSIVFFI  | IRWDP-ITYPH                  | -----             |
| SmoGPCATh2 | 115 | LAWAIIWRGSLVFS | SSIDK    | ISVLIHLLP      | ---- | IVFFIIRW   | WDP-STFSL                    | -----             |
| ZmaGPCATh1 | 143 | LAWAIVWRGSLVFS | GSFDK    | LSVLIHLLP      | ---- | IVLETIRW   | WDP-QTFAA                    | -----             |
| ZmaGPCATh2 | 140 | LAWAIVWRGSLVFS | SSFDK    | LSVLIHLLP      | ---- | IVLETIRW   | WNP-QTFAA                    | -----             |
| OsaGPCATh  | 162 | LAWAIVWRGSLVFS | SSFDK    | LSVLIHLLP      | ---- | IVLETIRW   | WNP-QTFAA                    | -----             |
| MacGPCATh1 | 154 | LAWAIVWRNSLVFS | SSLDK    | LSVLIHLLP      | ---- | IVFFTIRW   | WNP-ETFAA                    | -----             |
| StuGPCATh1 | 146 | LAWAIVWRGSLVFS | SSVDK    | LSVLIHLLP      | ---- | IVFETIRW   | WDP-EFFGA                    | -----             |
| StuGPCATh2 | 140 | LAWAIVWRGSLVFS | SSVDK    | TVSVFIHLLP     | ---- | IVFETIRW   | WDP-VFFGA                    | -----             |
| RcoGPCAT   | 158 | LAWAIVWRGSLVFS | SSVDK    | LSVLIHLLP      | ---- | IVFETIRW   | WNP-ATFEA                    | -----             |
| AthGPCAT   | 155 | LAWAIVWRGSLVFS | SSPDK    | LSVLIHLLP      | ---- | IVFETIRW   | WNP-ATFAA                    | -----             |
| BvuGPCATh  | 210 | LAWAIVWRGSLVFS | NSIDK    | TSVLIHLLP      | ---- | IVFETIRW   | WNP-STFAA                    | -----             |
| NnuGPCATh  | 152 | LAWAIVWRGSLVFS | SSPDK    | LSVLIHLLP      | ---- | IVFETIRW   | WDP-ATFEA                    | -----             |
| EguGPCATh  | 158 | LAWAIVWRGSLVFS | SSLDK    | LSVLIHLLP      | ---- | IVFETIRW   | WNP-ETFAA                    | -----             |
| NadGPCATh  | 170 | LAWAIVWRGSLVFS | SSVDK    | LSVLIHLLP      | ---- | IVFETIRW   | WDP-STVAD                    | -----             |
| AtrGPCATh  | 139 | LAWAIVWRGSLVFS | SSLDK    | LSVLIHLLP      | ---- | IVFETIRW   | WDP-TRLGD                    | -----             |
| LtuGPCATh  | 189 | LAWAIVWRGSLVFS | SSVDK    | LSVLIHLLP      | ---- | IVFETIRW   | WDP-VTFAA                    | -----             |
| NguGPCATh  | 191 | LAWAIVWRGSLVFS | SSVDK    | LSVLIHLLP      | ---- | IVFETIRW   | WDP-ATFAA                    | -----             |
| KflGPCATh  | 176 | LAWAIVWRGSLVFS | SSLDK    | LSVLIHLLP      | ---- | IVLFIIRW   | WDP-SNFSH                    | -----             |
| EmuGPCATh  | 123 | VYSAIILFRNS    | EVFNHYDK | TSVFIHLLP      | ---- | LLSYCIRW   | FPK-NSSNP                    | -----             |
| OviGPCATh  | 105 | AYSQAFILFRNAL  | VLDFOK   | VSSFIHLLP      | ---- | LLSYLIRW   | FPS-ETSTL                    | -----             |
| SpuGPCATh  | 167 | VTWASIVLFRN    | CLVHSIER | TCLIIHLLP      | ---- | LLTYLIRW   | YPT-ETSQH                    | -----             |
| CgiGPCATh  | 177 | LIWAMVVYRNS    | LVFHS    | TDKVTSAVTHLLP  | ---- | LLSFGIRW   | YRE-EVSKY                    | -----             |
| LgiGPCATh1 | 153 | LLWAAVIFRNS    | LVLSV    | VDKTVSVYIHTLPA | ---- | FLSFAIRW   | YSE-DTSMK                    | -----             |
| LgiGPCATh2 | 179 | LLWAMVYRNS     | LVLSH    | TDKTVSVYIHTLPA | ---- | FLSFEVIRW  | YPE-ESSSK                    | -----             |
| MciGPCATh1 | 224 | VAAWAVITWRNS   | LVFHS    | LDKTVSVFIHFFP  | ---- | IVMYCIRW   | MPE-LQRDIYC                  | -----DNTPFVTSYRNE |
| MciGPCATh2 | 219 | VLWAVITWRNS    | LVFHS    | LDKTVSVFIHFFP  | ---- | IVTYTIRW   | ETV-LHGDPDQ                  | -----A-----LVYRDQ |
| MveGPCATh  | 251 | LAFSAITWRNS    | LVLSH    | LDKTVSVYIHMSP  | ---- | FLTYTIRW   | LYP-DPE-H                    | -----A            |
| UmaGPCATh  | 246 | LAFSAITWRNS    | LVFHS    | LEKTVSFIHLYP   | ---- | FVFTTVH    | FEMP-HDEAV                   | -----S            |
| LbiGPCATh  | 177 | LASAITWRNS     | LVFHD    | QDKTVSEFIHLYP  | ---- | FTFTVIR    | HEY-NAE                      | -----A            |
| SpoGPCATh  | 200 | LAWSVAVAWRNS   | LVFHS    | LDKTVSFIHFFP   | ---- | IVLHTIV    | HLLTN-KSYLK                  | -----D            |
| SceGPCAT   | 201 | LCEAVITWRNS    | LVLSH    | TDKTVSFIHLLP   | ---- | CVMYVIR    | YHGLP-LEYKI                  | -----E            |
| LthGPCATh  | 196 | VTWASITWRNS    | LVLSH    | VDKTVSFIHMP    | ---- | IVTMYI     | HHGLG-EDLKR                  | -----A            |
| PhrGPCATh  | 203 | LSEAVITWRNS    | LVLSH    | TEKTVSFIHLYP   | ---- | IVTMYVIR   | HQLS-HEYKL                   | -----E            |
| NcrGPCATh  | 273 | NAIAIIMWRNS    | LVFHS    | LDKTVSFIHMP    | ---- | IVTLHCTIR  | VHLLD-PAEQR                  | -----K            |
| CbaGPCATh  | 261 | NAVAIVMWRNS    | LVFHS    | LDKTVSFIHMPP   | ---- | IVALHCTIR  | VHLLTP-DDYLR                 | -----E            |
| Ac1GPCATh  | 261 | NAVAIVMWRNS    | LVFHS    | MDKTVSFIHMP    | ---- | IVTLHCTIR  | VHLLTP-SKVLR                 | -----E            |
| Cg1GPCATh  | 268 | NAVAIVMWRNS    | LVFHS    | FDKTVSFIHMPC   | ---- | IVTLHCTIR  | VHLID-PAAQQ                  | -----A            |
| BbaGPCATh  | 265 | NAVAIVMWRNS    | LVFHS    | FDKTVSFIHMPC   | ---- | IVTLHCTIR  | VHLYP-EDKLO                  | -----G            |
| DdiGPCATh1 | 359 | LAWETIVWRNS    | LVFHD    | VDKTVSVFIHLLCP | ---- | IVTYCIRW   | FNP-VYPEQ                    | -----             |
| DdiGPCATh2 | 192 | LLGAVIPFRNS    | LVFHS    | LDKATSVIHFFP   | ---- | IVTYSLIRW  | NDE-FLFSK                    | -----             |
| AsuGPCATh  | 192 | LMWAVAVWRNS    | LVFHS    | LDKATSVIHLLP   | ---- | IVTASIRW   | HILPATHPI                    | -----             |
| EdiGPCATh  | 142 | LLTAVPMWRNS    | LVFHD    | DDRTSVYIHLFP   | ---- | IVLYCIRW   | VVL-TTVPQ                    | -----             |
| AcaGPCATh1 | 189 | LAWSVAVWRNS    | LVFHS    | LDKTVSFIHLLTPN | ---- | IVLYAIRW   | LDE-DPDSL                    | -----A            |
| AcaGPCATh2 | 222 | LAGAVVMWRNS    | LVFHD    | DDKTVSFIHLYP   | ---- | IVTYCIRW   | HHS-DSFVV                    | -----             |
| PhrGPCATh  | 255 | LAWAVPLWRNS    | LVFHD    | DDKTVSCAIIHLLP | ---- | IVTFQIRW   | FPS-DSSLSICGD                | -----             |
| NgrGPCATh1 | 225 | LATAIVMWRNS    | LVFHS    | LEKTVSVFIHFFP  | ---- | IVTFAIRW   | LMF-NDNTQ                    | -----             |
| NgrGPCATh2 | 179 | ILLAVVWRNS     | LVFHD    | DFDKTVSFIHFFP  | ---- | IVSFAIRW   | YPE--QFPE                    | -----             |
| MbrGPCATh  | 202 | LATAIVAVWRNS   | LVFHS    | LDKTVSVYIHLPA  | ---- | IVSFSWR    | WDEL-TECHA                   | -----             |
| BsaGPCATh  | 187 | LAWAVLAFS      | QLFHS    | APHVTSVFIHTEM  | ---- | IVTFAIRW   | LLP-DEHKA                    | -----             |
| OtaGPCATh  | 168 | VLLAVPLWRNS    | LVFHS    | VDKTVSFIHLLCP  | ---- | IVMTWCGR   | WYGF-GDENRLSVA               | -----             |
| MpuGPCATh1 | 194 | ILLAVPLWRNS    | LVFHS    | HDKTVSFIHTAP   | ---- | IVTYCARW   | YGO-DASPLVAIGAWSERV          | -----LGT          |
| MpuGPCATh2 | 151 | LAWAVPTGNAL    | VLSH     | SPKHAVALIHLSP  | ---- | IVTWAVIRW  | HAD-AHERA                    | -----             |
| MspGPCATh1 | 179 | ILLAVPLWRNS    | LVFHS    | HDKTVSFIHTAP   | ---- | IVTWCTR    | WYGO-GDLTWSWWGL-GDATGWLFAARE | -----GDHGQA       |
| MspGPCATh2 | 143 | LGWAVPALANAL   | VLSH     | VEHTAAFIHISPP  | ---- | IVVMWAVIRW | HAA-EHEAA                    | -----             |
| CreGPCATh  | 139 | ---KVGAGAGS    | AVRRAPHQ | TVSFIHLLP      | ---- | IVSWSIRW   | YGDPAARFGP                   | -----             |
| CowGPCATh  | 479 | LAWSVITWNS     | EVFHD    | LDKTVSSAIIHLLP | ---- | IVTYSLIRW  | YTP-LEGQA                    | -----             |
| CmeGPCATh  | 177 | VLWAVAVWRNS    | LVFHS    | LDKTVSVFIHFFP  | ---- | IVTYNARW   | HSD-LIISRRI                  | -----G-----ICSHE- |

End of DUF2838 |

## Cloning and characterization of GPCATs

```

PpaGPCATH1 161 H-----AVDDT-G---PWPAPW--LLEN-DRQ-LWTLWLVVPE-LIAYSWQILYLLVNVN---
PpaGPCATH2 160 H-----AIDDT-G---PWPAYP--LLEN-NQQ-LWTLWLVVPE-LIAYTWQILYLLVNVN---
SmoGPCATH1 183 H-----SLDAT-G---PWPAPW--LVHD-NRA-LWTLWLVVPE-LIAYSWQALYLLIVNVN---
SmoGPCATH2 161 H-----STELT-G---PWPAPW--LVQT-RTD-LWTLWLVVPE-LIAYTWQILYFLIVNVN---
ZmaGPCATH1 189 M-----HPEGR-D---ARVTWP--YVED-KSY-MWTLWLVVPE-LIAYTWQILYFLIVNVN---
ZmaGPCATH2 186 M-----HPEGR-D---ARVTWP--YVED-KSY-LWTLWLVVPE-LIAYTWQILYFLIVNVN---
OsaGPCATH 208 M-----HPEGR-A---ARVTWP--YVGD-KSY-LWTLWLVVPE-LIAYTWQILYFLIVNVN---
MacGPCATH1 200 M-----HPAGR-A---ARVSWP--YVED-KSY-LWTLWLVVPE-LIAYTWQILYFLIVDVN---
StuGPCATH1 192 M-----HPEGT-P---ERASWP--YVES-QSY-LWTLWLVVPE-LIAYFWQILYKLVVDV---
StuGPCATH2 186 M-----HPEGT-P---ERASWP--YVEN-QSY-LWTLWLVVPE-LIAYFFWQILYKLVIVEV---
RcoGPCATH 204 M-----HPEGT-S---GRSSWP--YVED-KSF-LWTLWLVVPE-LIAYFWQILYKLVIVNVN---
AthGPCATH 201 M-----HPVGT-D---RRVSWP--YVED-KAY-LWTLWLVVPE-LIAYTWQILYFLIVNVN---
BvuGPCATH 256 M-----HPEGT-A---RRVSWP--YIED-TSY-LWTLWLVVPE-LIAYTWQILYFLIVNVN---
NnuGPCATH 198 M-----HSDGNAG---RRASWP--YVEN-KSY-LWTLWLVVPE-LIAYTWQILYFLIVNVN---
EguGPCATH 204 M-----HPEGR-A---ARVFWP--YVED-KSY-LWTLWLVVPE-LIAYTWQILYFLIVNVN---
NadGPCATH 216 I-----HLEQKGG---HRTAWP--HVAD-KTT-LWTLWLVVPE-LIAYTWQILYFLIVNVN---
AtrGPCATH 185 V-----DAGQQAG---VKAAMP--SVED-NAE-LWTLWLVVPE-LIAYTWQILYFLIVNVN---
LtuGPCATH 235 M-----HPEGKAS---DRASWP--YVED-KSY-LWTLWLVVPE-LIAYTWQILYFLIVDVN---
AfiGPCATH 237 M-----HPTGEAG---GRSSWP--YVED-KAY-LWTLWLVVPE-LIAYTWQILYKLVIVNVN---
KflGPCATH 222 H-----SPDEF-GPWGHGHTFPW--VVED-TRK-VWTLWLVVPE-LIAYSWQALYKLVIVEV---
EmuGPCATH 169 WWKGFVN-----T-----GGSTNV--SVFN-PMD-DWTLWLVVPE-LIAYTWQILYKLVIVNVN---
OviGPCATH 151 WYTAFS-----T-----GAKPNI--YLWI-HDL-DWTLWLVVPE-LIAYTWQILYKLVIVNVN---
SpuGPCATH 213 WYQDFAN-----T-----EMA-TGW-ELWLVVPE-LIAYTWQILYKLVIVNVN---
CgiGPCATH 223 WFDEF-----V-----PEM-LEL-SPIWLVVPE-LIAYTWQILYKLVIVNVN---
LgiGPCATH1 199 WRKDF-----V-----PDI-NNW-SVQWLVVPE-LIAYTWQILYKLVIVNVN---
LgiGPCATH2 225 WPCHF-----I-----PLL-SEW-SIWLWLVVPE-LIAYTWQILYKLVIVNVN---
LcoGPCATH 273 RFPQVTN-----D-ITM-SKEAMLLS-TIAYLWQALYKLVIVNVN---
MciGPCATH1 284 RFPALDN-----L-ELP-SKDVMIYS-TIAYGLWQSLYKLVIVNVN---
MciGPCATH2 274 HFPALSK-----M-EVL-GWYTFVYS-TGFYLAQIFVCFVNVN---
MveGPCATH 297 RYPALKN-----M-EVL-PTAQSITAA-LIAYLWQILYKLVIVNVN---
UmaGPCATH 293 RFPALKN-----L-ITL-NGYTSWFEN-TIAYLWQILYKLVIVNVN---
LbiGPCATH 222 RFPALRE-----L-EYL-HPLRALLS-AGIYVWQFLYKLVIVNVN---
SpoGPCATH 247 RFPALVK-----V-KKI-DLLSSVEHA-SFFYALWQILYKLVIVNVN---
SceGPCATH 248 RFPALVK-----Q-SEL-DIKKNIWT-SIYLLWQSLYKLVIVNVN---
LthGPCATH 243 RFPALVK-----A-----G-----S-KKW-NLKNFWT-SIYLLWQSLYKLVIVNVN---
PkuGPCATH 250 RFPALVK-----L-QQW-DIMYGIIQT-SIYLLWQSLYKLVIVNVN---
NcrGPCATH 320 RFPALVK-----I-----KTSP--GS-PTAYA-NVISMLAWS-TIAYLWQILYKLVIVNVN---
CbaGPCATH 308 RFPALVK-----I-----KYSSK--GS-P-GHY-ELAAMLWA-TIAYLWQILYKLVIVNVN---
AclGPCATH 308 RFPALVK-----I-----KFSKP--GS-P-NHY-SLLSMLAWS-TIAYLWQILYKLVIVNVN---
CglGPCATH 315 RFPALVK-----I-----KTSPA--GS-STAYA-NVFSMLAWS-SIYLLWQILYKLVIVNVN---
BbaGPCATH 312 RFPALVK-----I-----KTAKP--GS-ATAYA-NIVSMLAWS-TIAYLWQILYKLVIVNVN---
DdiGPCATH1 405 LA-----CGGVE-CVL-SKEKFFVPE-LIAYTWQILYKLVIVNVN---
DdiGPCATH2 238 -Q---NQ-----I-EEP-NKNFYIYPE-LIAYTWQILYKLVIVNVN---
AsuGPCATH 239 -D---KE-----S-LTA-TTETFWPE-LIAYTWQILYKLVIVNVN---
EdiGPCATH 188 -----L-TIMNGLIIP-SFLYIHWQILYKLVIVNVN---
AcaGPCATH1 236 TYET-LR-----G-KDA-TTQMVFLPE-LIAYTWQILYKLVIVNVN---
AcaGPCATH2 268 CR---AD-CSI-SITASFVPE-LIAYTWQILYKLVIVNVN---
PbrGPCATH 305 -----EWP--S--C-GTV-ALKDAIYE-LIAYTWQILYKLVIVNVN---
NgrGPCATH1 271 TPKIITP-----I-----GESYSICVNED-CYV-SLVDIYVPH-CLFIWQILYKLVIVNVN---
NgrGPCATH2 224 YS-----VCIREN-CEV-TIYFVIVPH-LIAYTWQILYKLVIVNVN---
MbrGPCATH 248 -NPE-LE-----M-CQL-SLMDLVVPE-LIAYTWQILYKLVIVNVN---
BsaGPCATH 233 NFTIASA-----E-----AP----IYSDP-LNV-STFDLWKSVPYFYGWWVLYVWVNVN---
OtaGPCATH 219 -----DLD--SDVT-VLQ-GSLDLVYVPE-LIAYTWQILYKLVIVNVN---
MpuGPCATH1 253 RLPGLLG----GNA-NRLGVA-----ELSTP--M-TS-TRE-MLTEFYVPE-LIAYTWQILYKLVIVNVN---
MpuGPCATH2 197 F-PGVFG-----VPHANS-G-D---AKRGTS--Y--A-ESV-TTMDLVVPE-LIAYTWQILYKLVIVNVN---
MspGPCATH1 248 VAPGLMYADVAVHRAPNRLT-----VEQLT--MSYD-VVD-VVREFYIYPE-LIAYTWQILYKLVIVNVN---
MspGPCATH2 189 F-PGILP-----MPL-----DAA--N--G-SGL-CIVELTPA-LIAYTWQILYKLVIVNVN---
CreGPCATH 183 PPEATEQ-----E-----RE----RW--H-RA--GGLSNVLE-LIAYTWQILYKLVIVNVN---
CowGPCATH 525 SVCSQDD-----C-SIP-SVWSWSSP-LIAYTWQILYKLVIVNVN---
CmeGPCATH 231 -----AD-----C-IALGRRAITVPE-LIAYTWQILYKLVIVNVN---

```

Cloning and characterization of GPCATs

|            |     |                   |     |                 |         |                 |           |                          |          |       |        |   |
|------------|-----|-------------------|-----|-----------------|---------|-----------------|-----------|--------------------------|----------|-------|--------|---|
| PpaGPCATH1 | 207 | --LHQRILKDPEVM    | TSF | RELSRKA         | ----    | SR--A--NN--     | IWWRL     | SGIL                     | -----    | G     | D      |   |
| PpaGPCATH2 | 206 | --LRRQRLNDPEVM    | TSF | SRELSRKA        | ----    | QR--S--NN--     | IWWRL     | SGVL                     | -----    | G     | D      |   |
| SmoGPCATH1 | 229 | --LRRQRLLRDPEVM   | TSF | RELSRKA         | ----    | AR--A--NN--     | IWWWL     | SGIL                     | -----    | G     | E      |   |
| SmoGPCATH2 | 207 | --LRRQRLNDPEIM    | TSY | RELSRKA         | ----    | SR--A--NN--     | IWWRL     | SGIL                     | -----    | G     | A      |   |
| ZmaGPCATH1 | 235 | --LRRQRLLRDPEVM   | TSY | RELSKKA         | ----    | QK--A--NN--     | IWWRL     | SGIL                     | -----    | G     | D      |   |
| ZmaGPCATH2 | 232 | --LRRQRLLRDPEVM   | TSY | RELSKKA         | ----    | QK--A--NN--     | IWWRL     | SGIL                     | -----    | G     | D      |   |
| OsaGPCATH  | 254 | --LRRQRLKDPEVM    | TSY | RELSKKA         | ----    | QK--A--NN--     | IWWRL     | SGIL                     | -----    | G     | D      |   |
| MacGPCATH1 | 246 | --LRRQRLQDPEVM    | TSY | RELSKKA         | ----    | QK--A--NN--     | IWWRL     | SGIL                     | -----    | G     | D      |   |
| StuGPCATH1 | 238 | --LRRQRFQDPEVM    | TSY | RELSKKA         | ----    | KK--A--NN--     | VWWRV     | SGIL                     | -----    | G     | D      |   |
| StuGPCATH2 | 232 | --LRRQRLLRDPEVM   | TSY | RELSKKA         | ----    | KK--A--NN--     | MWWRV     | SGIL                     | -----    | G     | D      |   |
| RcoGPCATH  | 250 | --LRRQRLLRDPEVM   | TSY | RELSKKA         | ----    | QK--A--NN--     | VWWRV     | SGIL                     | -----    | G     | D      |   |
| AthGPCATH  | 247 | --LRRQRLLRDPEVM   | TSY | RELSKKA         | ----    | EK--A--NN--     | KLWQL     | SGIL                     | -----    | G     | D      |   |
| BvuGPCATH  | 302 | --LRRQRLLRDPEVM   | TSY | RELSKKA         | ----    | QK--A--NN--     | IWWRL     | SGIL                     | -----    | G     | D      |   |
| NnuGPCATH  | 245 | --LRRQRLLRDPEVM   | TSY | RELSKKA         | ----    | QK--A--NN--     | IWWRL     | SGIL                     | -----    | G     | D      |   |
| EguGPCATH  | 250 | --LRRQRLLRDPEVM   | TSY | RELSKKA         | ----    | QK--A--NN--     | IWWRL     | SGIL                     | -----    | G     | D      |   |
| NadGPCATH  | 263 | --LRRQRLLRDPEVM   | TSY | RELSKKA         | ----    | KK--A--NN--     | VWWRV     | SGVL                     | -----    | G     | D      |   |
| AtrGPCATH  | 232 | --LRRQRLLRDPEVM   | TSY | RELSKKA         | ----    | QK--A--NN--     | IWWRL     | SGVL                     | -----    | G     | D      |   |
| LtuGPCATH  | 282 | --LRRQRLLRDPEVM   | TSY | RELSKKA         | ----    | KK--A--NN--     | IWWRL     | SGIL                     | -----    | G     | D      |   |
| AfiGPCATH  | 284 | --LRRQRLLRDPEVM   | TSF | RELSKKA         | ----    | QK--A--NN--     | VWWRV     | SGIL                     | -----    | G     | D      |   |
| KflGPCATH  | 272 | --LRRQRLLRDPOVIL  | TSF | RELSRKA         | ----    | ER--A--NN--     | LFWWASGLL |                          | -----    | G     | D      |   |
| EmuGPCATH  | 216 | --LTKP---N-EKYN   | DNY | RYLRTKY         | ----    | FS--K--VD--     | FFKR---   | I---                     | -----    | P     | K      |   |
| OviGPCATH  | 198 | --CVKP---S-EKH    | DSY | RYMHKKK         | ----    | LL--A--HL--     | IWNR---   | F---                     | -----    | H     | A      |   |
| SpuGPCATH  | 256 | --ALGSTFSS-SEYL   | NNY | TFIAYQS         | ----    |                 | NN---     | VFSRAIRCK                | -----    | G     | G      |   |
| CgiGPCATH  | 261 | --MAKP---S-EEYV   | TSF | NYLGKKQ         | ----    |                 | DS---     | CLYKTFNVC                | -----    | G     | E      |   |
| LgiGPCATH1 | 237 | --FP--P---P-EEY   | TSY | KCLTAQE         | ----    |                 | SS---     | FMFAVDLIL                | -----    | G     | P      |   |
| LgiGPCATH2 | 263 | --CP--P---P-EHYQ  | TSY | RYLTSST         | ----    |                 | ST---     | FIYRAINLC                | -----    | G     | P      |   |
| LcoGPCATH  | 310 | --RRREKVES-GLRW   | TSY | SWLLDDS         | ----    | HG--R--KG--     |           | LIQKAAFVF                | -----    | G     | A      |   |
| MciGPCATH1 | 321 | --GRRDKVES-GLRW   | TSY | SWLLDDT         | ----    | HG--K--KG--     |           | FIQKMAFMF                | -----    | G     | P      |   |
| MciGPCATH2 | 311 | --AKRDKVES-GSRT   | TSY | TTLNLS          | ----    | PENKN--KS--     |           | FILATASLF                | -----    | G     | E      |   |
| MveGPCATH  | 334 | --RWREKVES-GKRW   | TSY | TWLLNDP         | ----    | K-----SG--      |           | MIAKTAHTF                | -----    | G     | E      |   |
| UmaGPCATH  | 330 | --RKKSKIET-GERL   | NSY | STMSXGK         | ----    | G-----          |           | PVANLKGKA                | -----    | P     | P      |   |
| LbiGPCATH  | 259 | --DRRAKIQS-GQRT   | TSF | SWLLNDK         | ----    | Q-----G--       |           | VIGRSLAST                | -----    | P     | P      |   |
| SpoGPCATH  | 284 | --GKQKIQE-G-RP    | TSF | TWLSKAY         | ----    | S-----KT--      |           | KLGRAVAKL                | -----    | P     | Q      |   |
| SceGPCATH  | 285 | --KSSKIKS-GERL    | TSF | EYLTHQ          | ----    | F-----KN--      |           | FW---AVKL                | -----    | R     | S      |   |
| LthGPCATH  | 282 | --RSSKIKS-QORA    | TSF | EYLTHQ          | ----    | F-----KN--      |           | FW---AAKL                | -----    | P     | E      |   |
| PkuGPCATH  | 287 | --RADKIKK-G-KV    | TSF | EYLRSMS         | ----    | N-----TH--      |           | KFVRFINSL                | -----    | P     | D      |   |
| NcrGPCATH  | 366 | --RRRDKIAA-G-RP   | TSF | TWLRKSY         | ----    | S-----KN--      |           | WLGKAILNL                | -----    | P     | D      |   |
| CbaGPCATH  | 353 | --RAEKIAA-G-RP    | TSF | TWLRKSY         | ----    | A-----KT--      |           | WIGKIVNSL                | -----    | P     | E      |   |
| AclGPCATH  | 353 | --RAEKIAA-G-RP    | TSF | TWLRKSY         | ----    | A-----KT--      |           | WIGKIVINL                | -----    | P     | E      |   |
| CglGPCATH  | 361 | --RRREKIAA-G-RP   | TSF | TWLRKSY         | ----    | S-----KV--      |           | WIGKIVLGL                | -----    | P     | S      |   |
| BbaGPCATH  | 358 | --LRRKIAA-G-RP    | TSF | TWLRKSY         | ----    | A-----RT--      |           | WIGKIVLSM                | -----    | P     | S      |   |
| DdiGPCATH1 | 441 | --VDSDKTANDKELM   | TSS | RWMSVQ          | ----    | P-----H--       |           | PIYRWQCKN                | -----    | G     | Y      |   |
| DdiGPCATH2 | 271 | --FKKDTLKE-NNYT   | TSL | SFLSTIK         | ----    | EG-EK--GS--     |           | LISRYLNFA                | -----    | K     | P      |   |
| AsuGPCATH  | 271 | --LQNTLRE-RNYT    | TTL | NELNLQ          | ----    | S-----NS--      |           | IYSRLNLI                 | -----    | P     | T      |   |
| EdiGPCATH  | 215 | --FKKETLKK-NHYT   | TSL | IWLSQEH         | ----    | P-----H--       |           | PVYLYLLKK                | -----    | G     | F      |   |
| AcaGPCATH1 | 272 | --TSAKKVEE-QDYQ   | TTF | RWFSSMD         | ----    | K-----GG--      |           | IGKLIKKA                 | -----    | S     | P      |   |
| AcaGPCATH2 | 302 | --MDKKLDSANIM     | TSL | RWFIRED         | ----    | K-----PH--      |           | PIYKALLVK                | -----    | G     | I      |   |
| PhrGPCATH  | 342 | RLSFPVSVADDDLQ    | TSF | KWLLSAN         | ----    | E-----GP--      |           | VFRVLRQKF                | -----    | PT    | L      |   |
| NgrGPCATH1 | 319 | --LDREYLQKQNNIQ   | TSY | NLLISK          | ----    | A-----F--       |           | IQTLSDKLY                | -----    | G     | K      |   |
| NgrGPCATH2 | 261 | --LDNLIKERSHVI    | TSF | RWTEMD          | ----    | K-----KS--      |           | KSYKLGQKF                | -----    | S     | A      |   |
| MbrGPCATH  | 283 | --NADHRTDQALE     | TSL | RWLASP          | ----    | GG--M--AAVAKTFC |           | RAVGLM                   | -----    | K     | PDENF  |   |
| BsaGPCATH  | 278 | --MGPRKRR-GYK     | TLE | DRVSEGG         | ----    | P-----T--       |           | KFLA-KISK                | -----    | N     | D      |   |
| OtaGPCATH  | 255 | --VDAKLDTPALM     | TSL | RWLASDR         | ----    | K-----SA--      |           | ANRFAKLTMRGIGLFGTDEFFDPK | -----    | T     | ---    |   |
| MpuGPCATH1 | 306 | --HDVKRLDEDPELV   | TSL | RWLAGDY         | ----    | K-----LA--      |           | VTRSTLRTRRRLGFKVDELFDAS  | -----    | S     | ---    |   |
| MpuGPCATH2 | 248 | --FGRHKGAKKTAVYGT | TPR | AELVSDTVYHYTMRT | ----    | --VKPFGD--      |           | VCGYEV                   | -----    | ---   | ARPSK  |   |
| MspGPCATH1 | 307 | --FYVKRLDNDPELV   | TSL | RWLANDY         | ----    | K-----AP--      |           | VTRWALRTSRRVGLFAQDELFDHN | -----    | S     | ---    |   |
| MspGPCATH2 | 232 | --HGRYHG-HSNTSG   | SSH | DTVFM           | ----    | LR--G--NK--     |           | VLSRWVGYD                | -----    | ---   | NDRPAD |   |
| CreGPCATH  | 224 | --FSRAKIQQR-GYR   | TLE | NYVTSQK         | ----    | K-----G--       |           | TFHARR                   | -----    | P     | P      |   |
| CowGPCATH  | 562 | --VDHAKIAANVR     | K   | TSY             | RWLSSSR | ----            | G-----H-- |                          | ISYRMNKF | ----- | D      | R |
| CmeGPCATH  | 264 | --LSRKLDRNPELIT   | TSL | RWLTRHS         | ----    | G-----S--       |           | AVSRVLRNLF               | -----    | G     | E      |   |





## Cloning and characterization of GPCATs

```

PpaGPCATH1 312 -----
PpaGPCATH2 312 -----
SmoGPCATH1 339 K-TESSPENPSKNVISIQ-----EESSGG--TAPRGLLSTNC-----NGSVSSVSS--E-
SmoGPCATH2 317 -----
ZmaGPCATH1 345 I-EQGSWTQGAPAD-GTY-----IG-----
ZmaGPCATH2 342 M-EQGSSTQGAPGG-DGG-----TLGNHH-----QHT-SEE---
OsaGPCATH 364 M-EEANSSQNAEES-QGD-----LSANG-----QHS-SEH---
MacGPCATH1 356 I-VEEPDRLSADLS-TSS-----HATSG-----EPS-G-----
StuGPCATH1 349 V-PQNDDEISLQES-ATE-----TNNTESE-----TVH-S-----
StuGPCATH2 342 V-TEQQHENPLQEN-SMK-----TP-----
RcoGPCATH 360 A-HTQQYHSEPKQD-QSP-----NSMEIR-----MKT-IHS---
AthGPCATH 358 I-EEQILHHEAVSH-PTE-----NEPKST-----E-----
BvuGPCATH 412 L-EAQPQLDSSSPL-DSP-----VSAQYI-----QQS-----
NnuGPCATH 355 L-PIQPNTVATVE-PSE-----DAKEPV-----K-IDH---
EguGPCATH 360 I-LEQPRQPVVDLS-TNH-----QHTSDT-----PDE-----
NadGPCATH 373 I-LSESTQAQKEV-AVP-----DGLEK-----SGDTNNA--QK
AtrGPCATH 342 I-TIPIDQPVESVP-MNM-----EKNECN-----SLDPPDA--EP
LtuGPCATH 392 I-PMQQQLDLSLAT-DTL-----THSD-----
AfiGPCATH 394 I-PTADQPVFDSHA-END-----YTSVGD-----YPSRVDG---
KflGPCATH 382 K-QGDAAKDTISQP-NSP-----GEVCQK-----CGS-LHSSASK
EmuGPCATH 318 P-VNSKSPTEMEDENED-----EE-----VD-----E-----
OviGPCATH 300 LEVLNPEHELLKNIDEG-----KN-----PG-----G--MCE---
SpuGPCATH 362 PE-----
CgiGPCATH -----
LgiGPCATH1 -----
LgiGPCATH2 -----
LcoGPCATH 419 S-GKQMDKSKT-----
MciGPCATH1 430 K-LKA-----
MciGPCATH2 422 E-KNQNSKILT-----KQRSLR-----R-----KQ-----QKHLDD---
MveGPCATH 441 S-AVAANQLAHDADKRD-----H-----EE-----EELHKQ---
UmaGPCATH 436 L-IRTAEKVVADAGKHK-----SG-----ME-----QEGHVE---
LbiGPCATH 366 E-STARSSGSSTPTTICS-----GP-----SE-----TDLTAM---
SpoGPCATH 390 E-TPTNSGSSSALS-----SV-----ND-----KDYLNV---
SceGPCATH 389 N-LQQKLQPDSDAVISDA-----SG-----VL-----
LthGPCATH 386 D-LQQLSQKANSSSNNY-----AT-----GI-----E-----
PkuGPCATH 393 A-MQDDIEERDKSGLSKV-----HA-----GA-----QEEENK---
NcrGPCATH 472 K-WQHSPDGMVHSPTLTP-----DS-----DV-----N-LNTA---
CbaGPCATH 459 K-WQNSPGAMFSPNGPV-----EN-----AS-----AAGARI---
AclGPCATH 459 R-WQASPAGTTSPTLLDS-----AV-----VS-----FVASPA---
CglGPCATH 467 K-WQHSPDVVPHEDGSGT-----QT-----ES-----VVIDPQ---
BbaGPCATH 464 K-WQTSPELMLTSPLMQP-----KF-----LA-----L-FLTS---
DdiGPCATH1 549 N-KDQPLKITSIK--AFL-----SSTNQST-----DHYQQLTPPNLKHQKGHET-----
DdiGPCATH2 381 K-IIMSSIGNTTSFNSNCDSPIMEYSKQQQSNTLNSTHHKKEKPK-----SSTNQST-----
AsuGPCATH 377 K-TIVSSFGAGDMSPMQ-----ST-----SP-----N-ALSE---
EdiGPCATH 322 R-SESNTSIQTPKILDER-----DAEKSQ-----
AcaGPCATH1 378 R-LRRGSLALQAINIGD-----PT-----KN-----S-FLSF---
AcaGPCATH2 411 S-EAKEKAKEKAKKGL-----
PhrGPCATH 452 R-ELSAVSQPDVYHGS-----
NgrGPCATH1 426 M-ENKEQTSAITQ-----
NgrGPCATH2 369 H-PPQTNQK--Q-----EEQAS-KDAQ-E-----QR-----
MbrGPCATH 404 V-AQEAKIEAIAELA-----GA-----KK-----D-----
BsaGPCATH 383 S-QGADGTTPLLS--SPR-----MD-----FT-----DSEIE---
OtaGPCATH 377 C-QMVNELTESELETMQT-----RK-----NT-----PPEGD---
MpuGPCATH1 428 L-RHEDQQDGIIVTEVTG-----K-----
MpuGPCATH2 368 --EDGGKKK-----AG-----SG-----DLARR---
MspGPCATH1 429 V-RDDDNADAVAEAVLA-----VE-----
MspGPCATH2 345 --RDNAPSEAPKKH-EH-----A-----GK-----E-----
CreGPCATH 330 A-PAHVSASATKK--D-----
CowGPCATH 668 V-PSVVSPPA--D--V-----A-----GK-----E-----
CmeGPCATH 372 K-IETNASSNPE-----KSSM-----

```

## Cloning and characterization of GPCATs

```

PpaGPCATH1 -----
PpaGPCATH2 -----
SmoGPCATH1 383 E-----KKA-----ICS--LCQQL-SSRKFE---LQK--
SmoGPCATH2 -----
ZmaGPCATH1 -----
ZmaGPCATH2 370 -----
OsaGPCATH 391 -----
MacGPCATH1 381 -----
StuGPCATH1 375 -----
StuGPCATH2 360 -----
RcoGPCAT 388 -----
AthGPCAT 381 -----
BvuGPCATH -----
NnuGPCATH 381 -----
EguGPCATH 385 -----
NadGPCATH 403 A-----
AtrGPCATH 373 L-----
LtuGPCATH 412 -----
AfiGPCATH 423 Q-----N-----GHP--VVDAN-ESKLVA---DAN--
KflGPCATH 414 DSLNGSLSGSGELET--NGDG-----LKG--QMDAE-----
EmuGPCATH 340 -----
OviGPCATH 326 -----S--DADVPCRLV-----SCESAHKIT--ELT---CH-----SAH
SpuGPCATH -----
CgiGPCATH -----
LgiGPCATH1 -----
LgiGPCATH2 -----
LcoGPCATH 430 -----
MciGPCATH1 434 -----
MciGPCATH2 448 -----K-----
MveGPCATH 467 -----G--REQ-----E-----EE--
UmaGPCATH 463 -----E--DRD-----EDKE-----QQAAA---AAA---AAAS--
LbiGPCATH 393 -----V--SAS-----KQPG-----PAS--DISE-----DSPT--
SpoGPCATH -----
SceGPCAT 416 -----N--RDE-----DFDD-----SS--
LthGPCATH 407 -----
PkuGPCATH 415 -----
NcrGPCATH 499 -----R--LGE-----P--TKNNNNSDSNDSSGSSTSSL----DNIP--LLTEEKSELPASATATATG-
CbaGPCATH 485 -----K--D-----DSSKGHDKRQSI---DKIP--LLEDTGQPQQN-----
AclGPCATH 486 -----L--DDS-----TSAHKECDKASL---DQIP--PLDAHAATTGS-----
CglGPCATH 494 -----A--GAS-----TTGSLADGISGKRLDDDMRGVSGV---DNIP--LLNDERPAAVL---ATGAD-
BbaGPCATH 491 -----P--KKA-----SGTPSFEPQAQTARDAMARTTSL---DRIP--LLDDYTTANST-----
DdiGPCATH1 573 -----
DdiGPCATH2 445 -----QFSDSTS-----YI---G-----HE--
AsuGPCATH 401 -----TSDNA-----I---G-----
EdiGPCATH 348 -----T-----
AcaGPCATH1 -----
AcaGPCATH2 437 -----C--S-F-----FVPALTI-----
PbrGPCATH -----
NgrGPCATH1 -----
NgrGPCATH2 -----
MbrGPCATH 430 -----APEQD-----V---Q-----
BsaGPCATH 403 -----
OtaGPCATH 403 -----
MpuGPCATH1 454 -----
MpuGPCATH2 -----
MspGPCATH1 455 -----S--G-----
MspGPCATH2 -----
CreGPCATH 343 -----
CowGPCATH 683 -----
CmeGPCATH -----

```

## Cloning and characterization of GPCATs

```

PpaGPCATH1 -----
PpaGPCATH2 -----
SmoGPCATH1 404 -----A-----V-EEA-----TSSVRDLG-----LEPALFSRIK-----
SmoGPCATH2 -----
ZmaGPCATH1 -----
ZmaGPCATH2 370 -----
OsaGPCATH 391 -----
MacGPCATH1 381 -----
StuGPCATH1 375 -----
StuGPCATH2 360 -----
RcoGPCATH 388 -----
AthGPCATH 381 -----
BvuGPCATH -----
NnuGPCATH 381 -----
EguGPCATH 385 -----
NadGPCATH 404 -----E-----
AtrGPCATH 374 -----C-----
LtuGPCATH 412 -----
AfiGPCATH 442 -----Q-----V-D-----LLS-----
KflGPCATH 441 -----M-KLRLGNGKSEEEAKGEKVLGKNGV
EmuGPCATH 340 SLRHN----LE-----TAL-EED----RDS--D-----I-----
OviGPCATH 353 SVDSSTNVMLE----YDSMAS-KER----NGD--N-----I-----
SpuGPCATH -----
CgiGPCATH -----
LgiGPCATH1 -----
LgiGPCATH2 -----
LcoGPCATH 430 -----
MciGPCATH1 434 -----
MciGPCATH2 449 -----
MveGPCATH 474 -----GV-----VV-EDK--K--NI-----
UmaGPCATH 483 -----GL--P--Q-----AG-ENK--K--DQ-----
LbiGPCATH 412 -----SL--DPTL-----NL-DFK--K--DS-----
SpoGPCATH -----
SceGPCATH 426 -----SV-SS-----KS--D-----
LthGPCATH 407 -----E-----
PkuGPCATH 415 -----S-----
NcrGPCATH 547 -----AEV--D--GGAKD-VA-RAR--R-PGA--E-LFG--AG-----AAPS-----
CbaGPCATH 514 -----GN--A--NGGPN-SEANAR--A-TGA--E-ILYEAKGNVLDKKNVSAPL-----
AclGPCATH 517 -----DK--A--NITTD-TM-RER--R-----
CglGPCATH 542 -----MDM--D--GGARD-VA-RER--RMGSG--E-S-----R-----
BbaGPCATH 533 -----GF--D--GGARD-VA-RER--K--ST-----E-----
DdiGPCATH1 576 -YLK-----LIL-----
DdiGPCATH2 457 -----DL--A--PDTDD-VH-HHYNYS--S-----KPN-----
AsuGPCATH 408 -----EVG--S-----SPQ-----
EdiGPCATH 349 -----SDA--E-----
AcaGPCATH1 -----
AcaGPCATH2 447 -LYF-----LIERAL-AFA-----T-----
PbrGPCATH -----
NgrGPCATH1 -----
NgrGPCATH2 -----
MbrGPCATH 437 -----ELNE--ST--E-----DPF-----
BsaGPCATH 403 -----Q-----
OtaGPCATH 403 -----QILMTPV-----
MpuGPCATH1 454 -----GRR-----
MpuGPCATH2 -----
MspGPCATH1 457 -----GGD-LA-RRS-----GGG--D-L-----ARRSGGPQ-----
MspGPCATH2 -----
CreGPCATH 343 -----A-----
CowGPCATH 683 -----Q-----
CmeGPCATH -----

```

```

PpaGPCATH1 -----
PpaGPCATH2 -----
SmoGPCATH1 427 -----PT-----D-----AI-SCAS
SmoGPCATH2 -----
ZmaGPCATH1 -----
ZmaGPCATH2 370 -----HI-----Q-----E-----
OsaGPCATH 391 -----S-----
MacGPCATH1 381 -----M-----
StuGPCATH1 375 -----E-----
StuGPCATH2 360 -----Q-----
RcoGPCATH 388 -----AE-----E-----Q-----
AthGPCATH 381 -----T-----
BvuGPCATH -----
NnuGPCATH 381 -----F-----
EguGPCATH 385 -----QN-----N-----S-----
NadGPCATH 405 -----VN-----N-----S-----
AtrGPCATH 375 -----RT-----N-----SL-----
LtuGPCATH 412 -----Y-----
AfiGPCATH 448 -----SG-----D-----E-----
KflGPCATH 466 ENGNGLHQRSIARANSCGTESGDKVSVEMNGKSSSLGLAR
EmuGPCATH 358 -----EV-----
OviGPCATH 378 -----AV-----
SpuGPCATH -----
CgiGPCATH -----
LgiGPCATH1 -----
LgiGPCATH2 -----
LcoGPCATH 430 -----A-----
MciGPCATH1 434 -----K-----
MciGPCATH2 449 -----LN-----
MveGPCATH -----
UmaGPCATH -----
LbiGPCATH -----
SpoGPCATH -----
SceGPCATH -----
LthGPCATH -----
PkuGPCATH -----
NcrGPCATH -----
CbaGPCATH 552 -----TGA-----TM
AclGPCATH -----
CglGPCATH -----
BbaGPCATH -----
DdiGPCATH1 -----
DdiGPCATH2 477 -----Q-----
AsuGPCATH 415 -----LLSV-----
EdiGPCATH -----
AcaGPCATH1 -----
AcaGPCATH2 -----
PbrGPCATH -----
NgrGPCATH1 -----
NgrGPCATH2 -----
MbrGPCATH 447 -----KL-N-----
BsaGPCATH -----
OtaGPCATH 410 -----D-----
MpuGPCATH1 457 -----E-----T-----
MpuGPCATH2 -----
MspGPCATH1 478 -----KSL-----R-----
MspGPCATH2 -----
CreGPCATH -----
CowGPCATH -----
CmeGPCATH -----

```

### Appendix S1. Sequence alignment analysis of GPCATs.

The protein sequences of GPCATs were aligned using the T-Coffee PSI/TM-Coffee web-service (<http://tcoffee.org.cat/apps/tcoffee/do:tmcoffee>) and BoxShade (<http://www.ch.embnet.org>) was used for shading background according to conservation. Sequence numbering is according to the full-length protein sequences. See Fig. 3 for species abbreviations. The proteins for which catalytic GPCAT activity was determined (Fig. 7) have names highlighted in green. Sequence IDs: AcaGPCATH1, XP\_004338657.1; AcaGPCATH2, XP\_004368210.1; AclGPCATH, XP\_001270843.1; AfiGPCATH, b3\_c2279; AsuGPCATH, XP\_012748160.1; AthGPCATH, NP\_198396.1; AtrGPCATH, XP\_011622896.1; BbaGPCATH, KGQ05851.1; BsaGPCATH, CUE73576.1; BvuGPCATH, XP\_010666443.1;

CbaGPCATH, KIW96763.1; CgiGPCATH, EKC38105.1; CglGPCATH, XP\_001229114.1; CmeGPCATH, XP\_005537575.1; CowGPCATH, XP\_004348404.1; CreGPCATH, XP\_001693172.1; DdiGPCATH1, XP\_636790.1; DdiGPCATH2, XP\_643621.1; EdiGPCATH, XP\_001738020.1; EguGPCATH, XP\_010936661.1; EmuGPCATH, CDS42477.1; KflGPCATH, kfl00299\_0090; LbiGPCATH, XP\_001876784.1; LcoGPCATH, CDH53915.1; LgiGPCATH1, ESO91084.1; LgiGPCATH2, XP\_009058350.1; LthGPCATH, XP\_002553792.1; LtuGPCATH, b4\_c3038; MacGPCATH, XP\_009407293.1; MbrGPCATH, XP\_001747618.1; MciGPCATH1, EPB88260.1; MciGPCATH2, EPB92530.1; MpuGPCATH1, XP\_003062419.1; MpuGPCATH2, XP\_003058481.1; MspGPCATH1, XP\_002501336.1; MspGPCATH2, XP\_002508227.1; MveGPCATH, KFH63290.1; NadGPCATH, b3\_c6890; NcrGPCATH, XP\_011394510.1; NgrGPCATH1, XP\_002675713.1; NgrGPCATH2, XP\_002673223.1; NnuGPCATH, XP\_010273972.1; OsaGPCATH, EAY74703.1; OtaGPCATH, XP\_003078006.1; OviGPCATH, XP\_009166064.1; PbrGPCATH, CEO94537.1; PkuGPCATH, KGK40379.1; PpaGPCATH1, XP\_001771632.1; PpaGPCATH2, XP\_001756364.1; RcoGPCATH, XP\_002514086.1; SceGPCATH, NP\_011665.1; SmoGPCATH1, XP\_002985957.1; SmoGPCATH2, XP\_002979497.1; SpoGPCATH, NP\_596320.2; SpuGPCATH, XP\_003729899.1; StuGPCATH1, XP\_006342345.1; StuGPCATH2, XP\_006338125.1; UmaGPCATH, XP\_011391556.1; ZmaGPCATH1, XP\_008656604.1; ZmaGPCATH2, NP\_001130177.1
